# Supplementary material for: Cross center single-cell RNA sequencing study of the immune microenvironment in rapid progressing multiple myeloma
Source: PubMed Central journal article supplement (PMC9879959; doi:10.1038/s41525-022-00340-x), 2023-01-26
Supplement: 41525_2022_340_MOESM2_ESM.pdf [file 41525_2022_340_MOESM2_ESM.pdf]

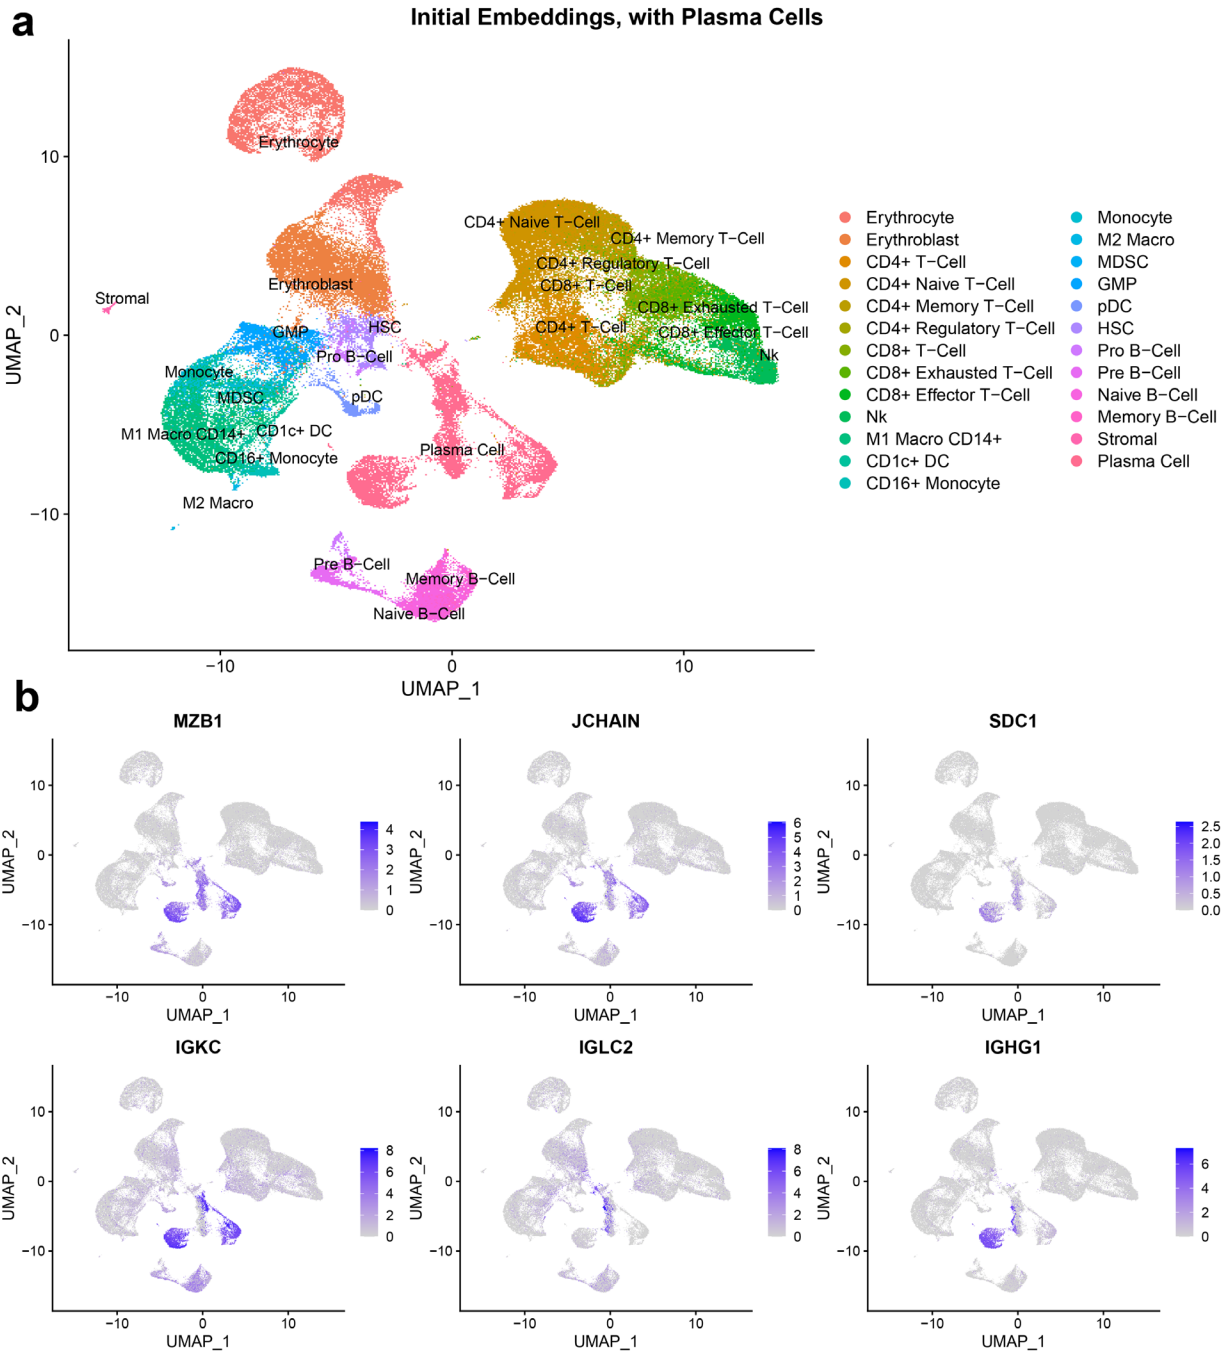

**Supplementary Figure 1: Analysis of the Plasma cells identified in the study. a.** UMAP embeddings of bone marrow microenvironment cells along with Plasma cells identified in the study. **b.** Feature plots of genes to identify the plasma cell populations. Plasma cells were identified via a variety of markers, including *JCHAIN*, *MZB1*, *SDC1*, and high expression of a light or heavy chain immunoglobulin.

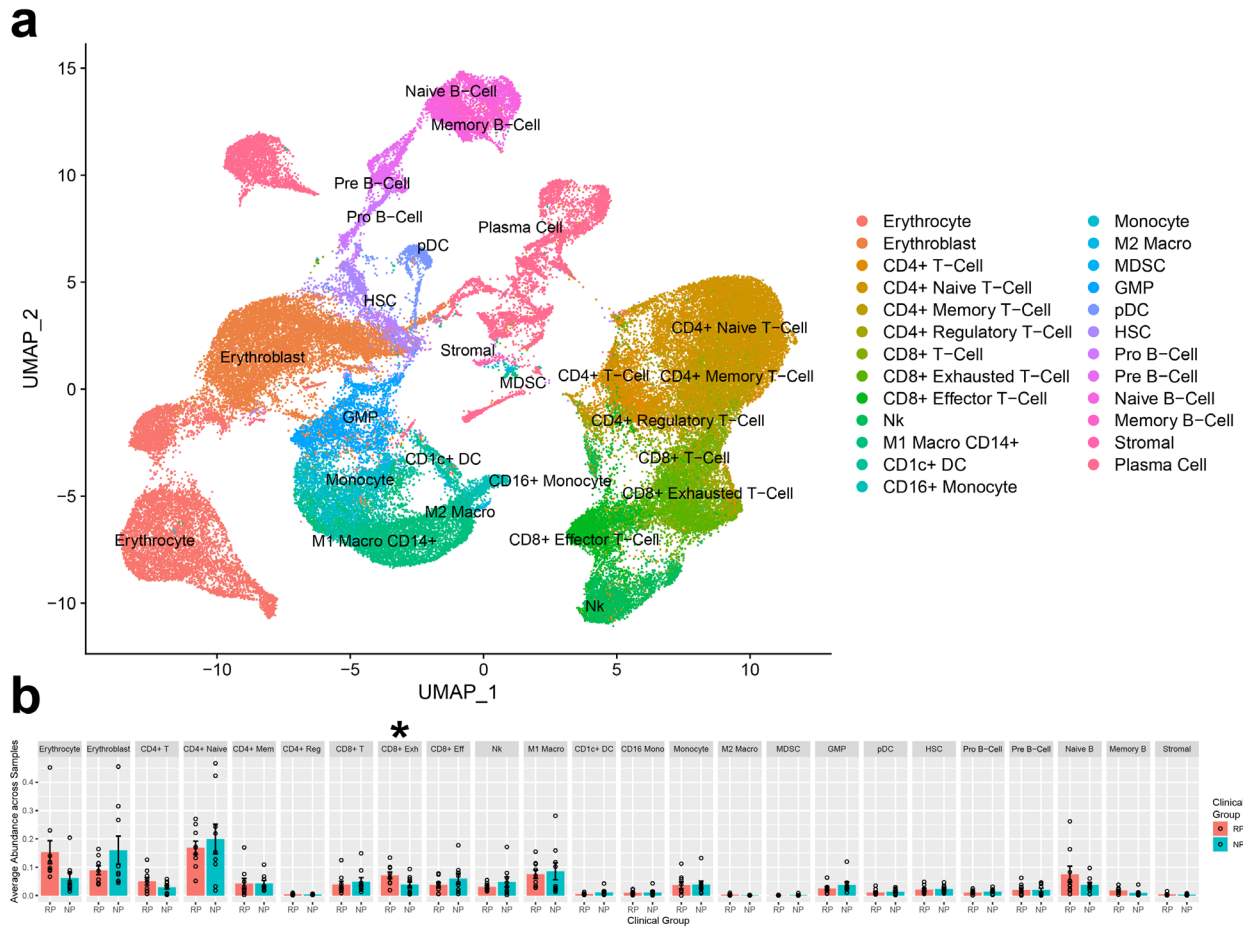

**Supplementary Figure 2: Analysis of single-cell data using lower mitochondrial cutoff.** **a.** UMAP of samples from all centers filtered using a 20% mitochondrial UMI cutoff to understand the impact on clustering patterns. **b.** Comparison of the average ratio of the various non-plasma cells in RP and NP patient samples. RP samples have a significantly ( $P = 0.049$ ) higher ratio of CD8<sup>+</sup> Exhausted T-cells relative to the rest of the CD138<sup>+</sup> population. Each bar plot depicts the mean proportion of cells within individual samples with an error bar displaying the standard error of mean. Dots represent the proportion of a given cell type in an individual sample.

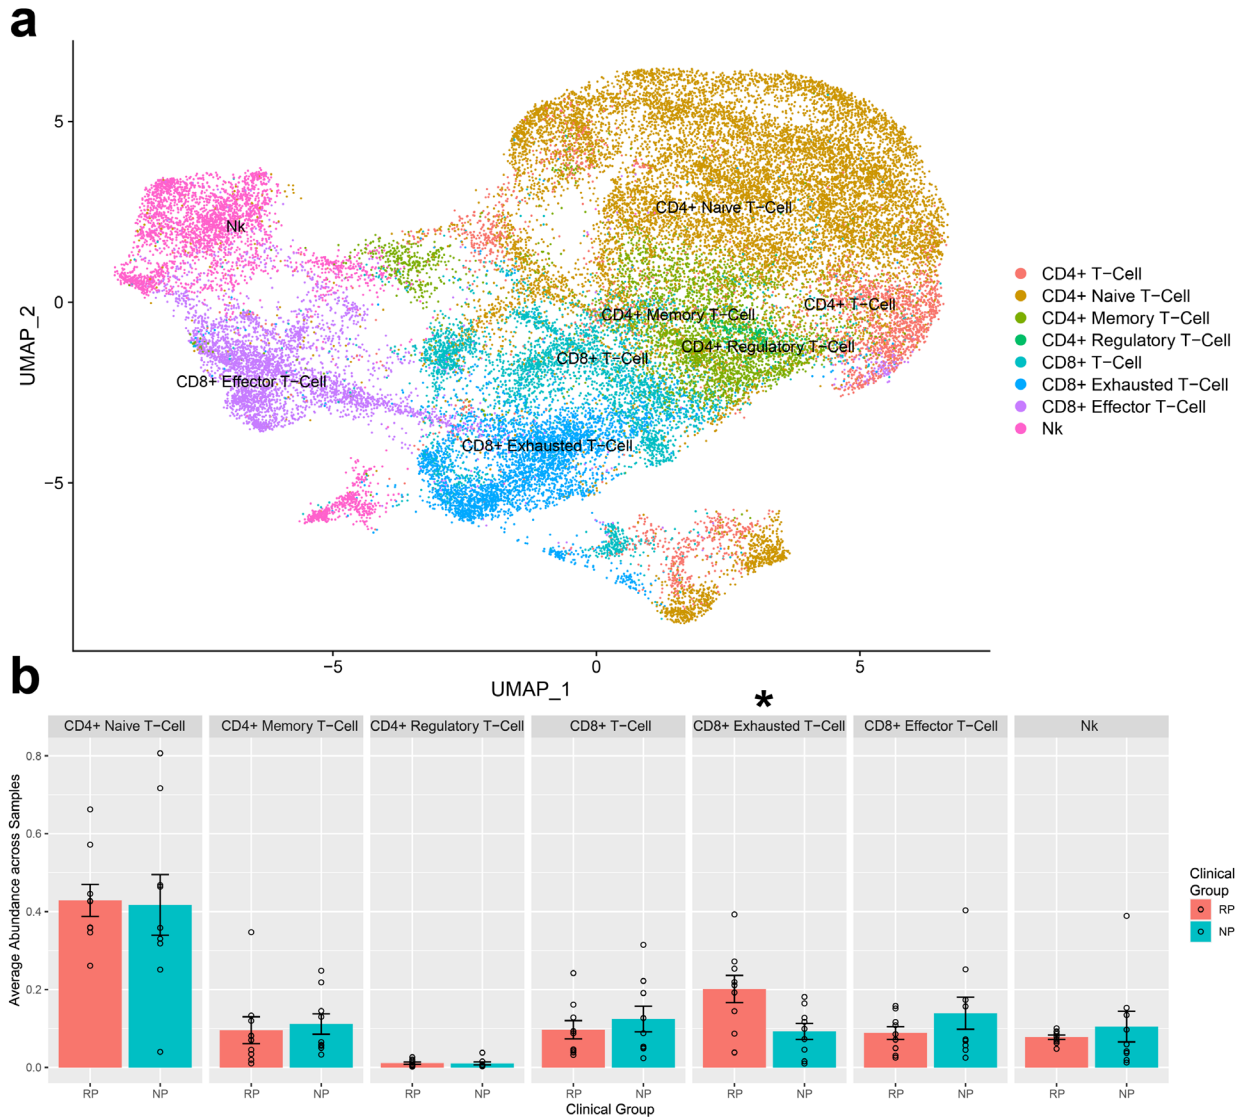

**Supplementary Figure 3: Focused analysis on T cell subset after filtering out cells with >20% mitochondrial UMI. a.** UMAP of T-cells following a 20% mitochondrial filter. **b.** Comparison of the average ratio of the various T-cell subtypes in RP and NP patient samples. CD8<sup>+</sup> Exhausted T-cells remain significantly enriched as a fraction of all T-cells ( $P = 0.019$ ) with a stricter mitochondrial filter. Each bar plot depicts the mean proportion of cells within individual samples with an error bar displaying the standard error of mean. Dots represent the proportion of a given cell type in an individual sample.

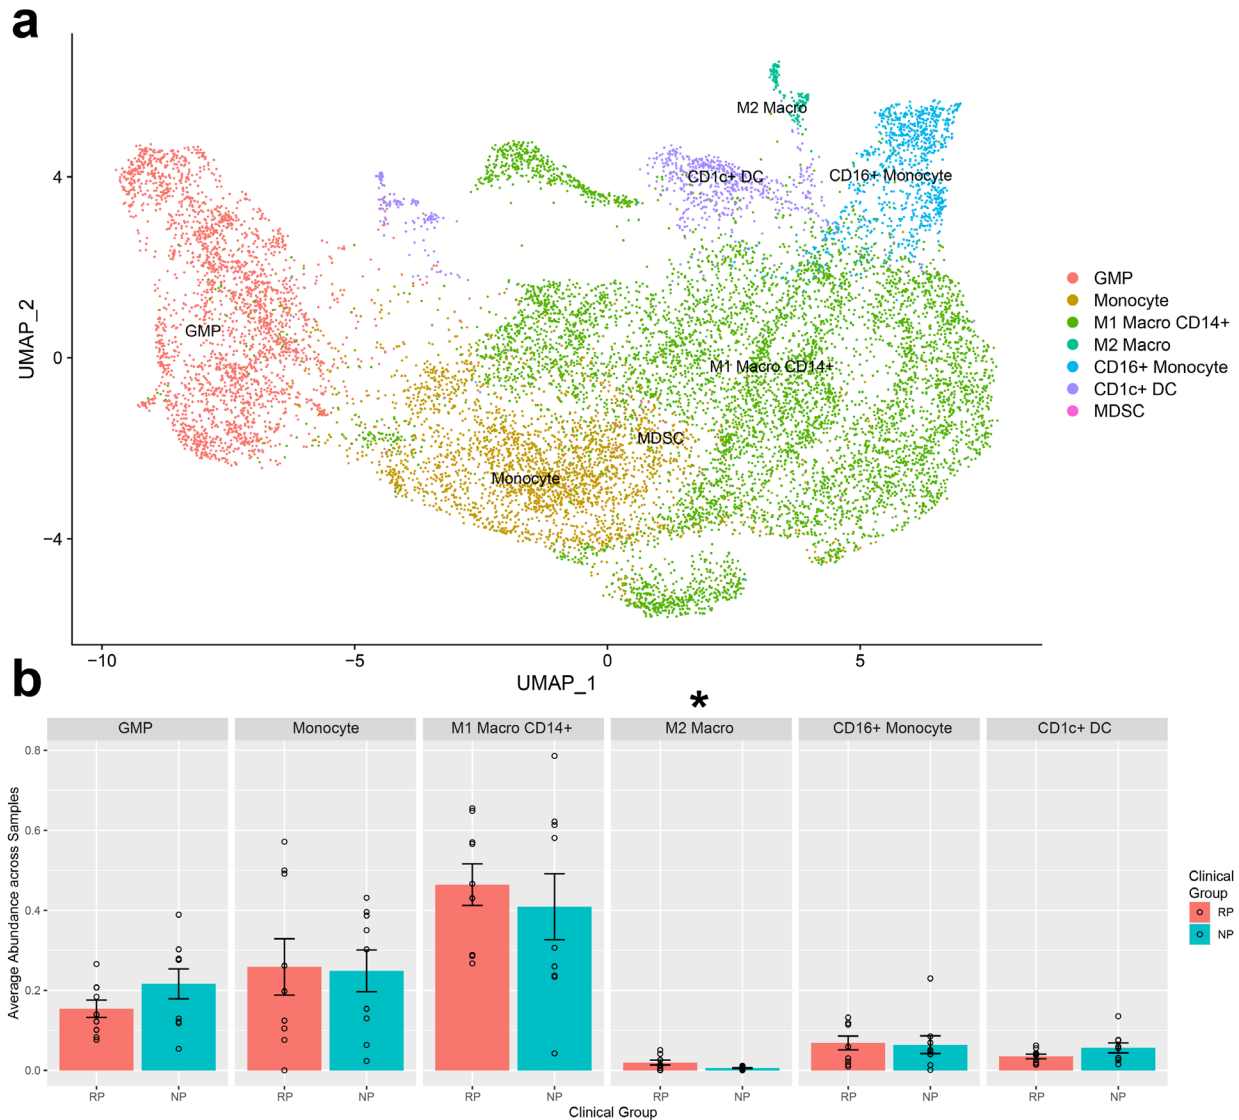

**Supplementary Figure 4: Focused analysis on Monocyte and Macrophages after filtering out cells with >20% mitochondrial UMI.** **a.** UMAP of myeloid samples following a 20% mitochondrial filter. **b.** Comparison of the average ratio of the various myeloid subtypes in RP and NP patient samples. M2 Macrophages remain significantly enriched in RPs as a fraction of all myeloid cells ( $P = 0.049$ ) with a stricter mitochondrial filter. Each bar plot depicts the mean proportion of cells within individual samples with an error bar displaying the standard error of mean. Dots represent the proportion of a given cell type in an individual sample.

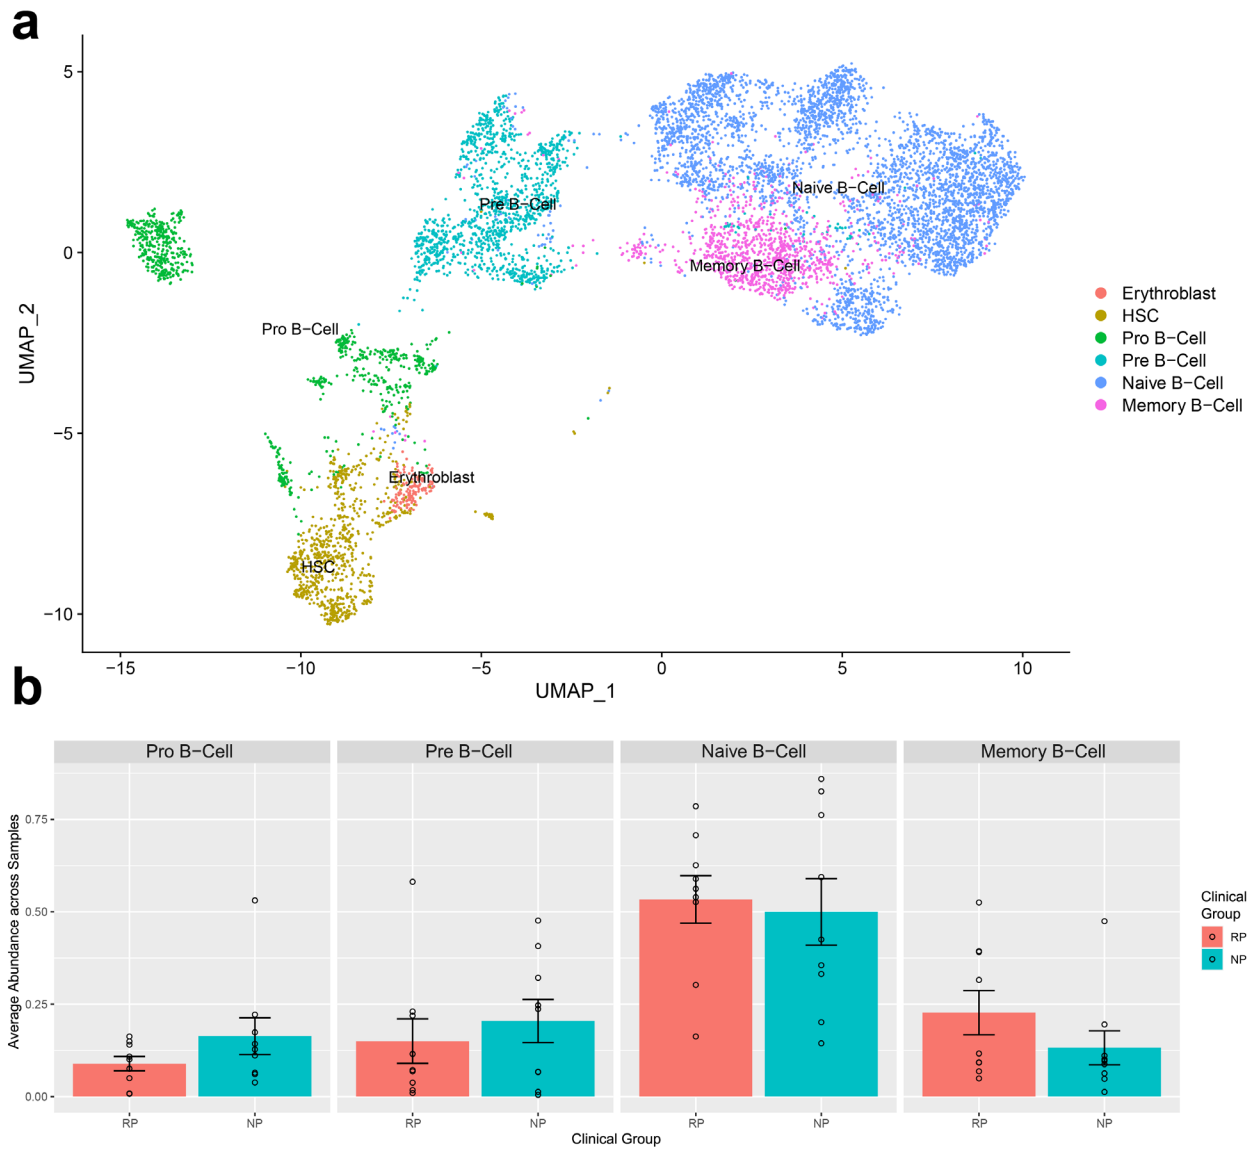

**Supplementary Figure 5: Focused analysis on B- and progenitor cells after filtering out cells with >20% mitochondrial UMI. a.** UMAP of B-cell and Progenitor samples following a 20% mitochondrial filter. **b.** Comparison of the average ratio of the various B-cell subtypes in RP and NP patient samples. Each bar plot depicts the mean proportion of cells within individual samples with an error bar displaying the standard error of mean. Dots represent the proportion of a given cell type in an individual sample.

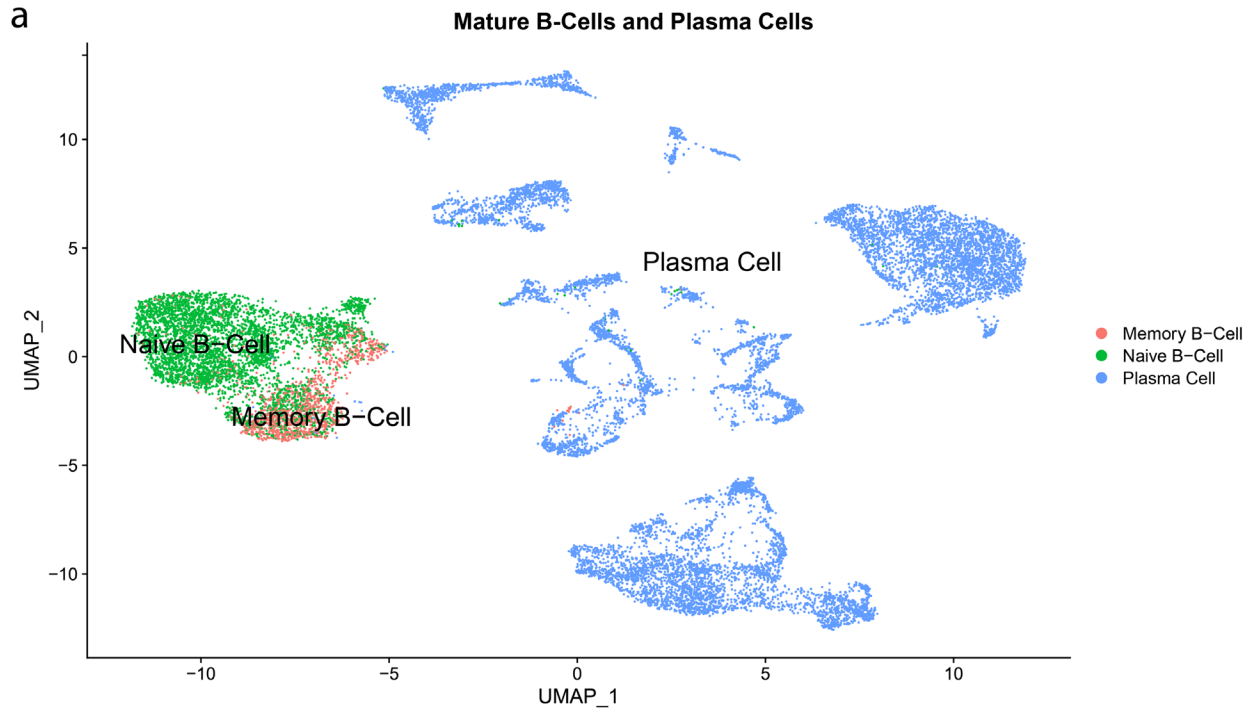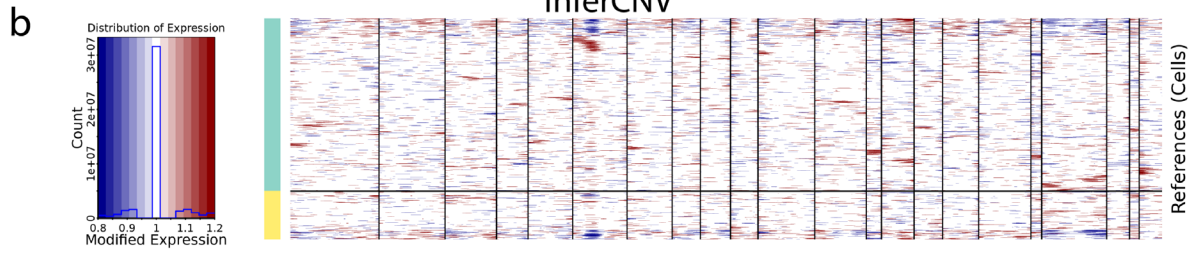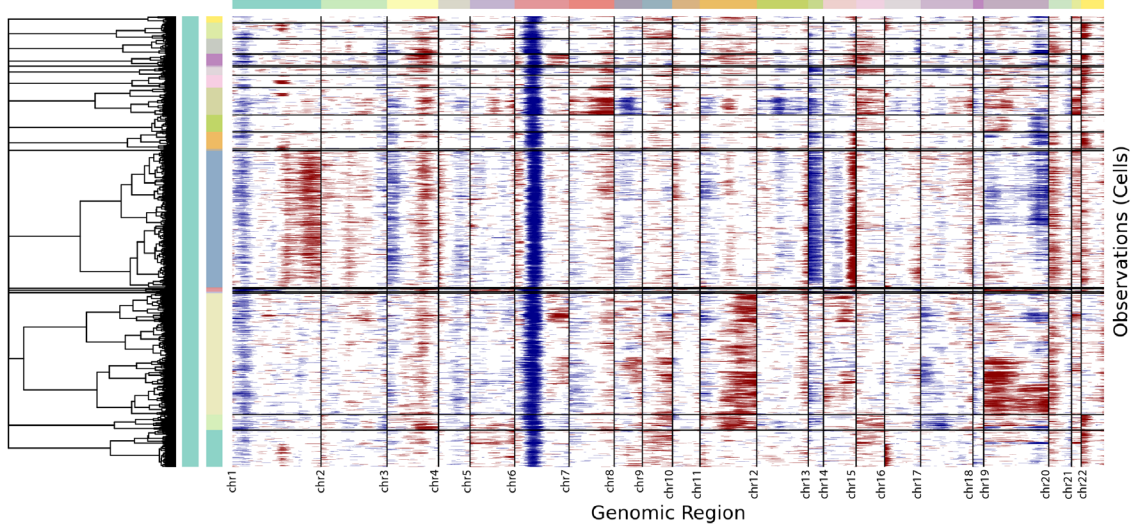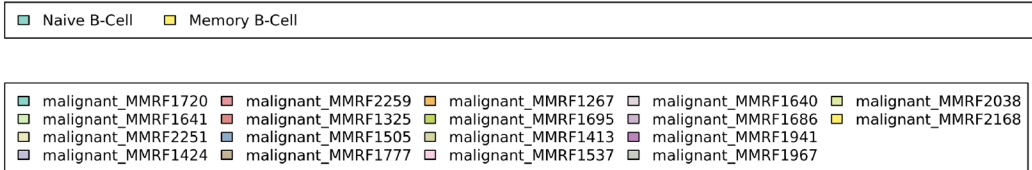

**Supplementary Figure 6: Comparative analysis of malignant Plasma cells with normal cells in our dataset.** Plasma Cells were compared with the closest normal reference population in our dataset, Naïve and Memory B-cells, to verify if technical differences could drive some of the copy number variations (CNVs) observed in the InferCNV analysis. **a.** Plasma and mature B-cells were subsetted and analyzed after normalization, variable feature selection and identifying UMAP embeddings. Plasma cells show distinct separation from the mature B-cell population and form multiple distinct subclusters. **b.** CNV analysis was performed on the plasma cells using the memory and naïve B-cell populations as a normal reference. Multiple deletions were detected across plasma cells on chromosomes 1 and 6, likely due to phenotypic differences between plasma and B-cell populations.

a

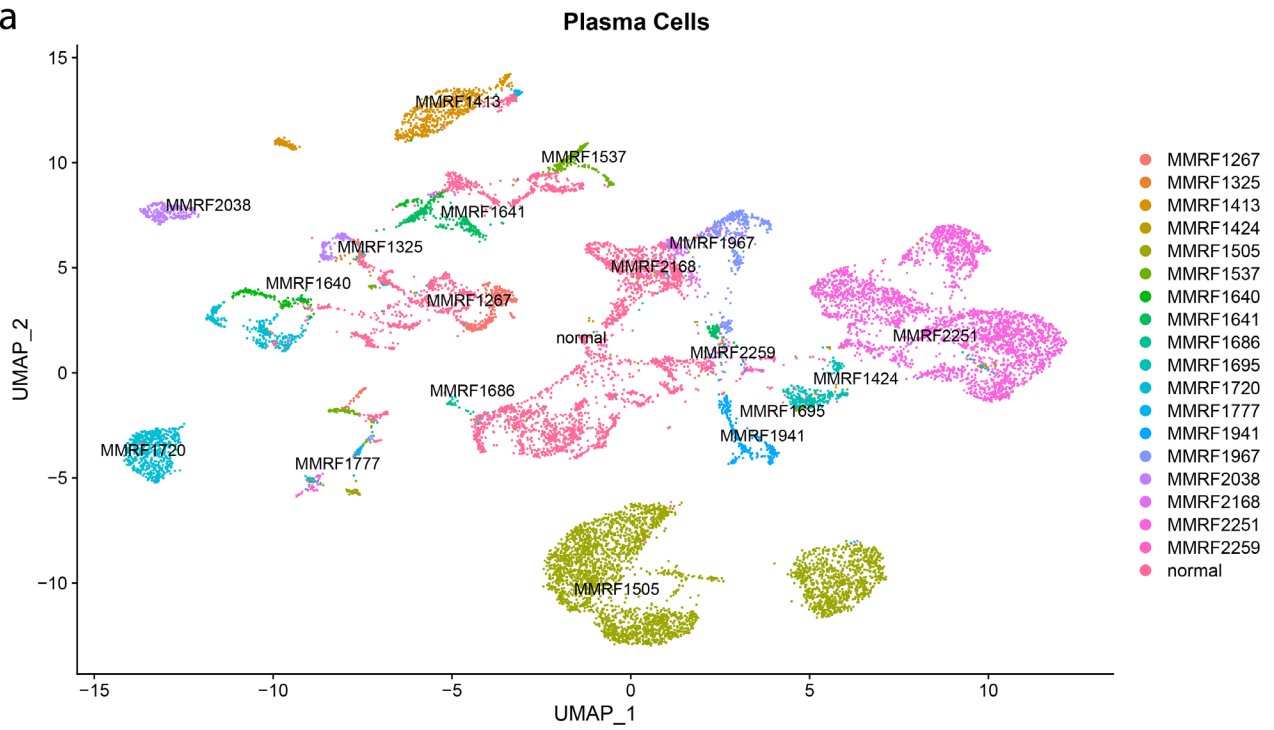

b

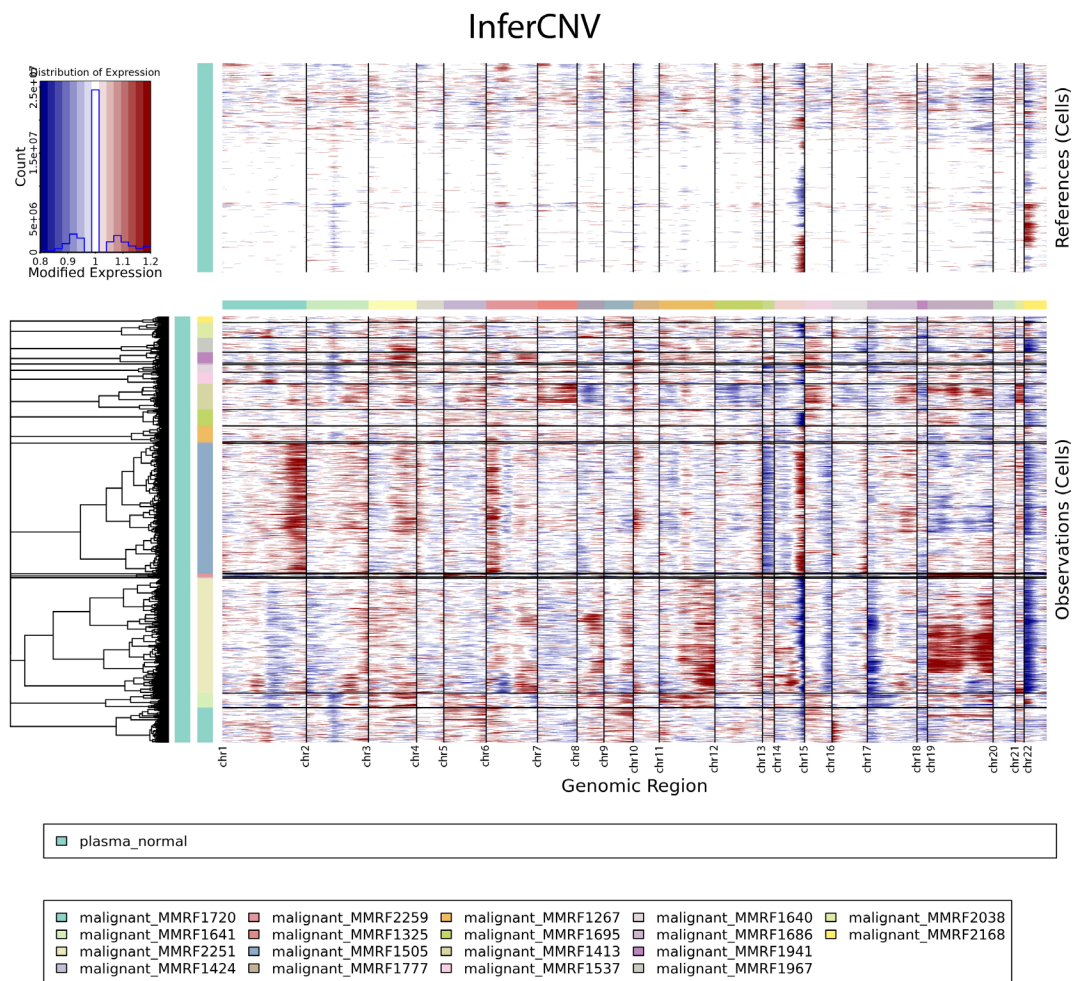



**Supplementary Figure 7: Analysis of the plasma cells from multiple myeloma samples and the human cell atlas (HCA).** **a.** UMAP embedding of the plasma cells after merging multiple myeloma and HCA plasma cells, colored by sample source. Plasma cells are very heterogenous and show little co-embedding between datasets, or between individual patients within our multiple myeloma dataset. Plasma cells were identified via marker expression of *JCHAIN*, *MZB1*, and *SDC1* genes. A large portion of the plasma cells remaining in the CD138<sup>+</sup> fractions were derived from two patients, MMRF1505 and MMRF2251. **b.** Copy number variation analysis on the plasma cells from our dataset along with the HCA plasma cells as a normal reference performed using the InferCNV algorithm. Estimated CNVs were displayed with respect to genomic region across the columns, while rows display individual cells, grouped by source. Chromosomal amplifications (red) and deletions (blue) inferred across each chromosome are represented, with MM plasma cells and normal HCA plasma cells shown in the bottom and top heatmap respectively.



UMAP plot was calculated based on the distribution of center labels among the cell's 100 nearest neighbors. The analysis was performed on normalized data without any batch effect correction. **c.** Shannon's entropy estimation after batch effect correction using integration anchors approach. **d.** Violin plots of Shannon's entropy prior to batch effect correction, grouped by cell type and split by the center. The CD4<sup>+</sup> T-cells from BIDMC and MSSM T-cells show much lower entropies, indicating a significant batch effect. **e.** Violin plots of Shannon's entropy after batch effect correction, grouped by cell type and split by the center. Most cell types show high entropy metrics, indicating better mixing of samples from different centers, though the lower quality CD4<sup>+</sup> T-cells still show low entropy, as they primarily are derived from the BIDMC samples.

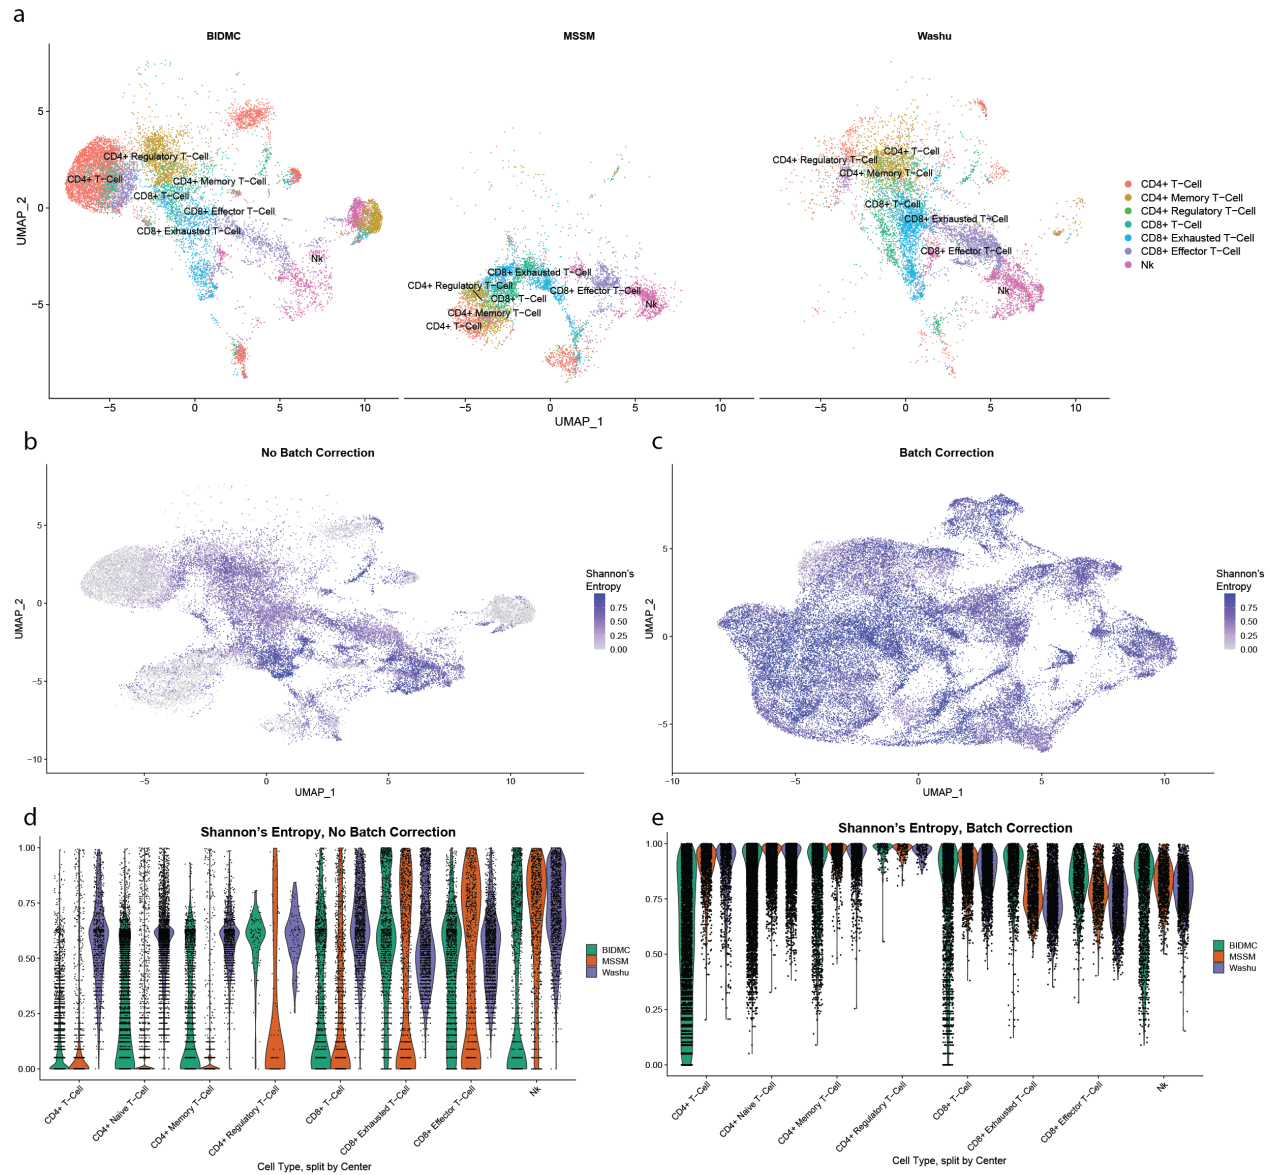

**Supplementary Figure 9: Estimating the impact of different data generating centers on the single-cell profiles of T cells.** **a.** UMAP embeddings of the normalized single-cell data of T cells without any batch correction and split based on data generating centers. CD8<sup>+</sup> T and NK cell types show somewhat similar co-embeddings among centers, though CD4<sup>+</sup> T cells show larger batch effects. Samples from BIDMC and WashU primarily differ in CD4<sup>+</sup> T-cell class, which is a lower quality subset primarily derived from BIDMC samples. **(b-c)** Shannon's entropy estimation is based on centers before (B.) and after (C.) batch correction. CD8<sup>+</sup> T cells and NK cells generally show higher entropies, while CD4<sup>+</sup> T Cells show lower entropies before batch effect correction. After batch correction, entropy is generally higher for all cell types, including the CD4<sup>+</sup> cells. **(d-e)** Violin plots of Shannon's entropy before (D) and after (E) batch correction, grouped by cell type and split by the center. Each dot represents an individual cell. CD4<sup>+</sup> T-cells show near zero entropy prior to integration, indicating large batch effects. Following integration-based batch correction, T cell subtypes show high entropy metrics, indicating better mixing of samples from

individual centers, though the lower quality of CD4<sup>+</sup> T-cells still shows low entropy, as they primarily are derived from BIDMC samples.

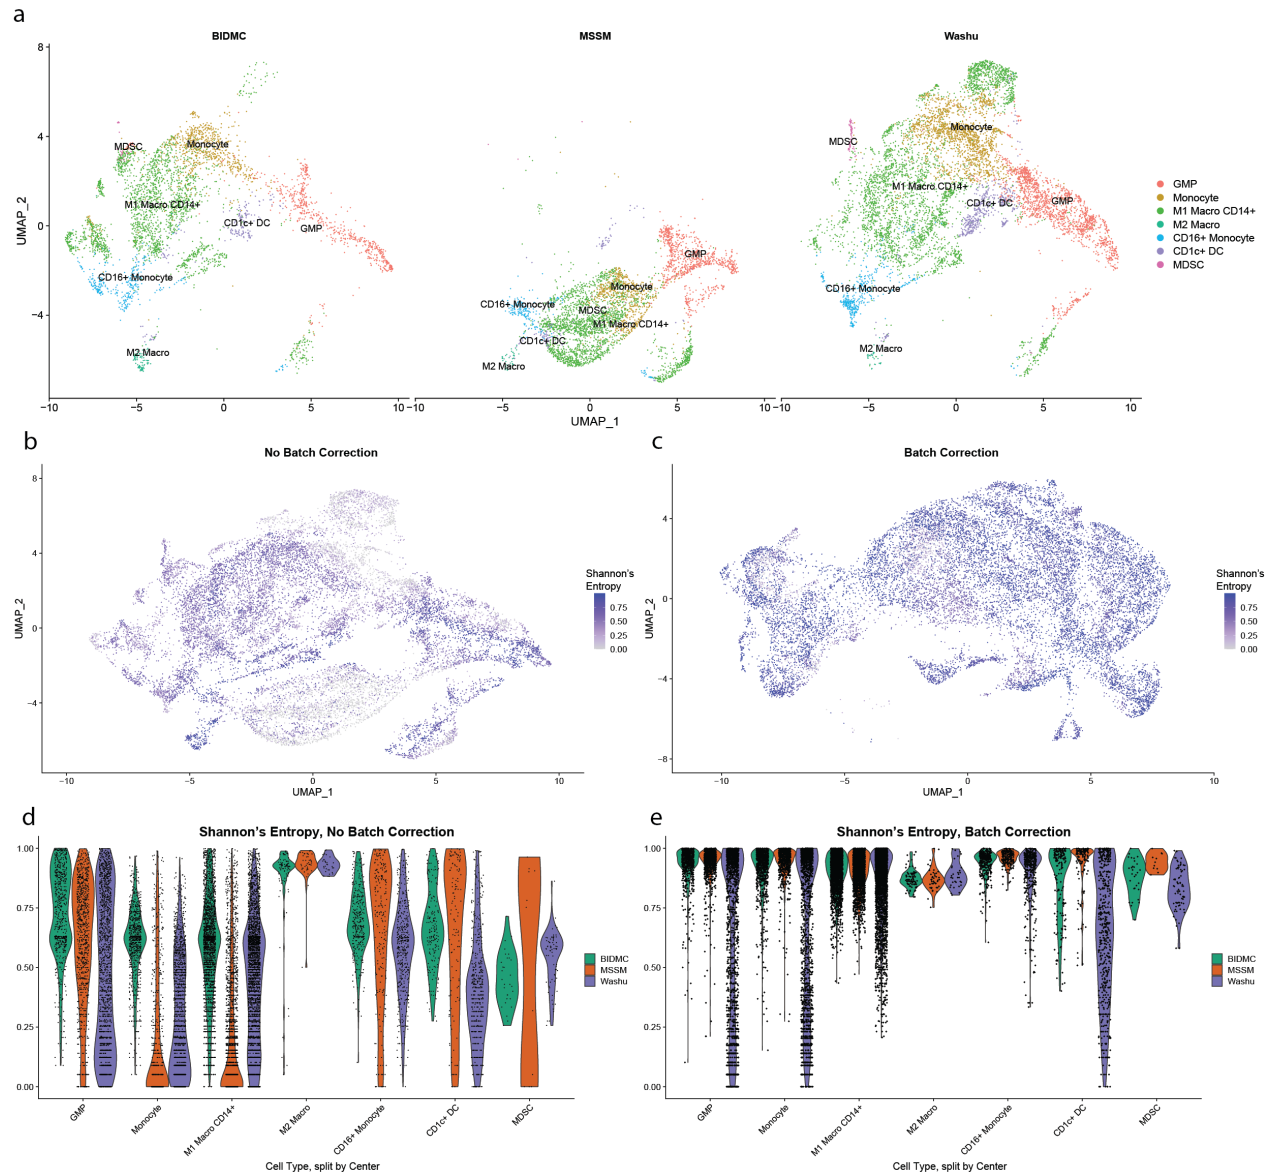

**Supplementary Figure 10: Estimating the impact of different data generating centers on the single-cell profile of Monocytes and Macrophages.** **a.** UMAP embeddings of the normalized single-cell data of Monocytes and Macrophages without any batch correction and split based on data generating centers. WashU and BIDMC show display relatively consistent co-embeddings, while MSSM M1 Macrophage and Monocyte clusters generally embed independently of other centers. **(b-c)** Shannon's entropy estimation for data from each center before (b) and after (c) batch effect correction. Shannon's entropy is generally lower for MSSM samples, and higher for WashU and BIDMC samples. Less abundant cell types, such as M2 macrophage and CD16 monocytes, co-embed and display higher entropies than more abundant cell types. Entropy increases following batch correction, with the primary exception being M2 macrophages, which showed little center-dependent batch effect prior to integration. **(d-e)** Violin plots of Shannon's entropy before (d) and after (e) batch effect correction, grouped by cell type and split by center. Each dot represents an individual cell.

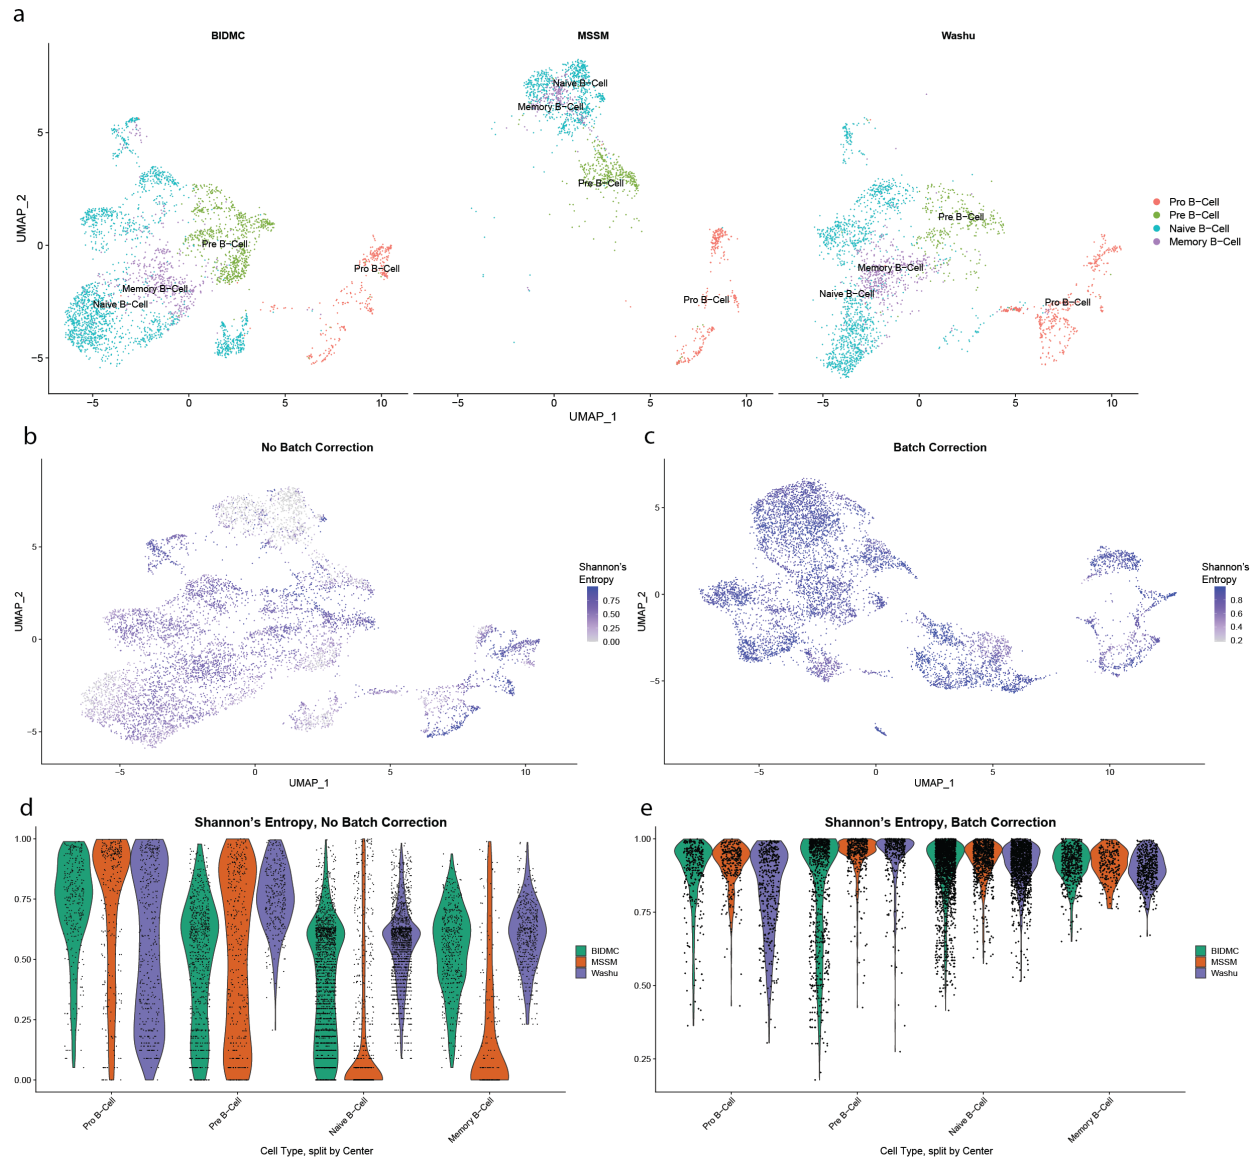

**Supplementary Figure 11: Estimating the impact of different data generating centers on the single-cell profile of B cells** **a.** UMAP embeddings of the normalized single-cell data of B cells without any batch effect correction and split based on data generating centers. Immature populations such as the Pro-B cells generally display more consistent embeddings among three centers. The mature populations show a larger batch effect between MSSM and the other two centers, with some sample-specific clusters present in comparing BIDMC to WashU samples. **(b-c)** Shannon's entropy estimation before (b) and after (c) batch correction. Shannon's entropy was higher for the less mature Pro B-cell population, while mature B-cell types tended to have lower entropies. Following integration, all B-cells display higher entropies, as expected. **(d-e)** Violin plots of Shannon's entropy before (d) and after (e) batch effect correction, grouped by cell type and split by the center. Each dot represents an individual cell.

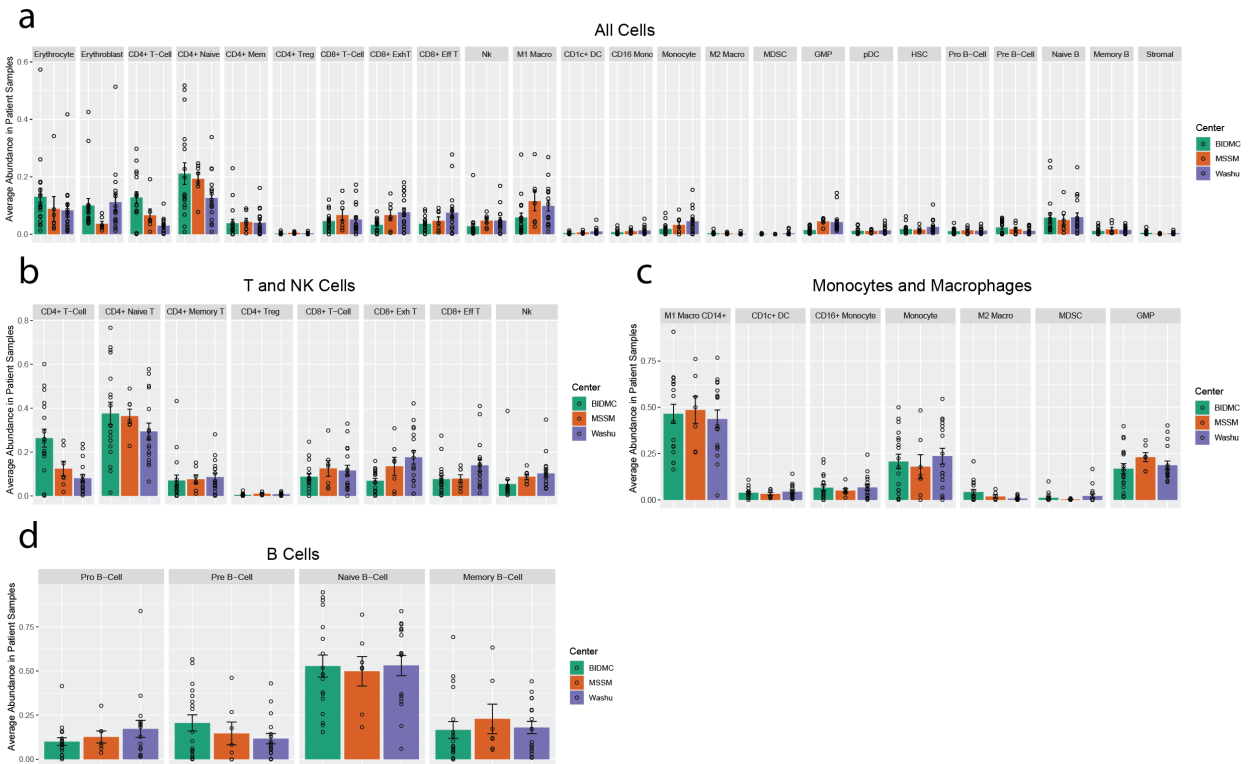

**Supplementary Figure 12: Cellular abundance analysis for samples across each data generating center.** Comparative analysis of cell type proportion across centers. Each bar represents the mean proportions of cells  $\pm$  standard error for a given cell type for all samples processed at each center. Dots in each bar represent cell type ratios from individual patients. **a.** Cell ratios display the per-center cell type ratios for 24 major cell types identified in the study. **b.** Bar plots displaying the per-center T-cell subtype ratios. **c.** Bar plots displaying the per-center Mono/Macro subtype ratios. **d.** B-Cell subtype ratios.



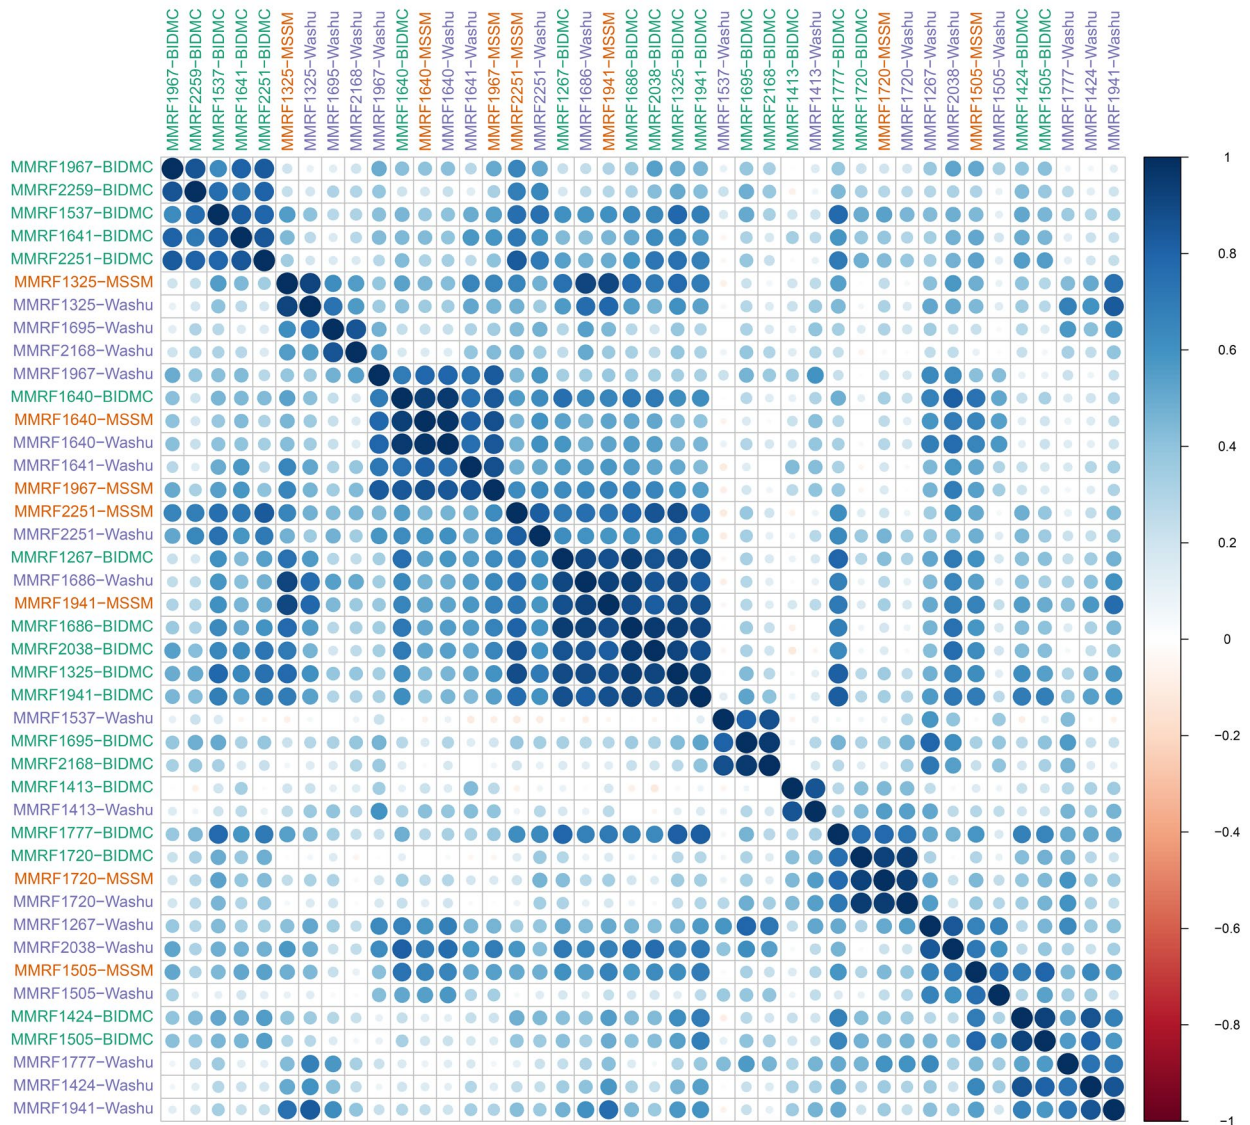

**Supplementary Figure 13: Correlation among cellular enrichment from different centers.** The Pearson correlation was computed between the ratios of different cell types identified at individual processing center. The correlation of cell type ratios between centers varies from sample to sample not showing any specific pattern. Some samples such as MMRF1640, MMRF1720, and MMRF1505 show high correlations across processing centers, while other samples such as MMRF2168 show weaker correlations with samples from other locations.

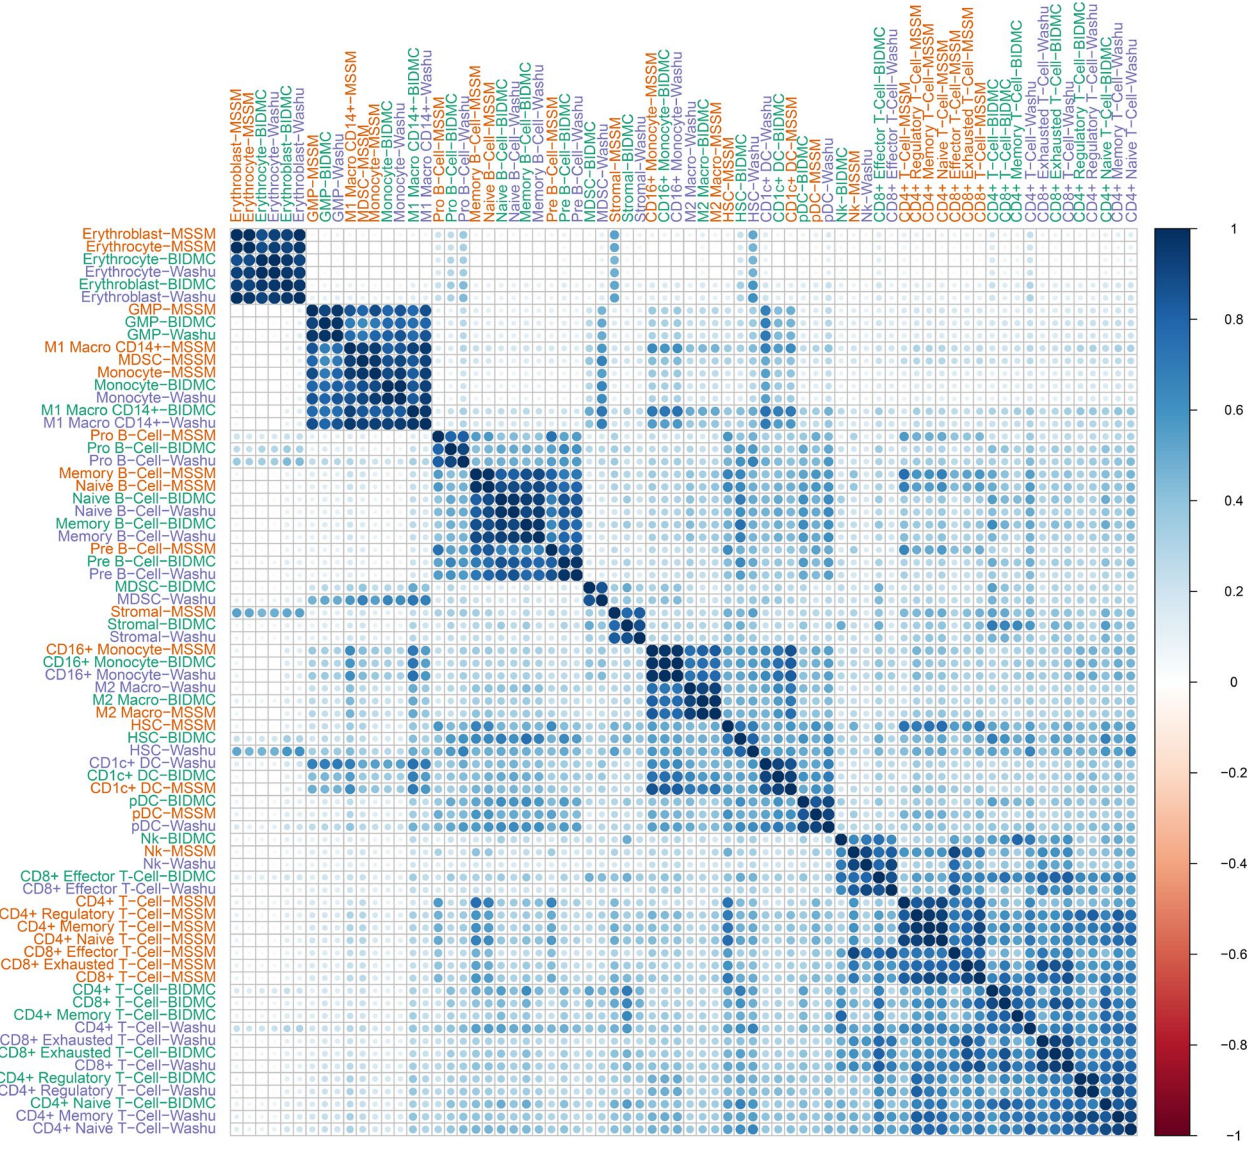

**Supplementary Figure 14: Correlation of transcriptomic profiles for individual cell types across centers.** Pearson Correlation of the top 2000 variable genes for all cell types across centers after normalization. Generally, the strongest correlations observed between major cell compartments (Erythroid, Myeloid, B-Cell, T-cell) irrespective of the center.

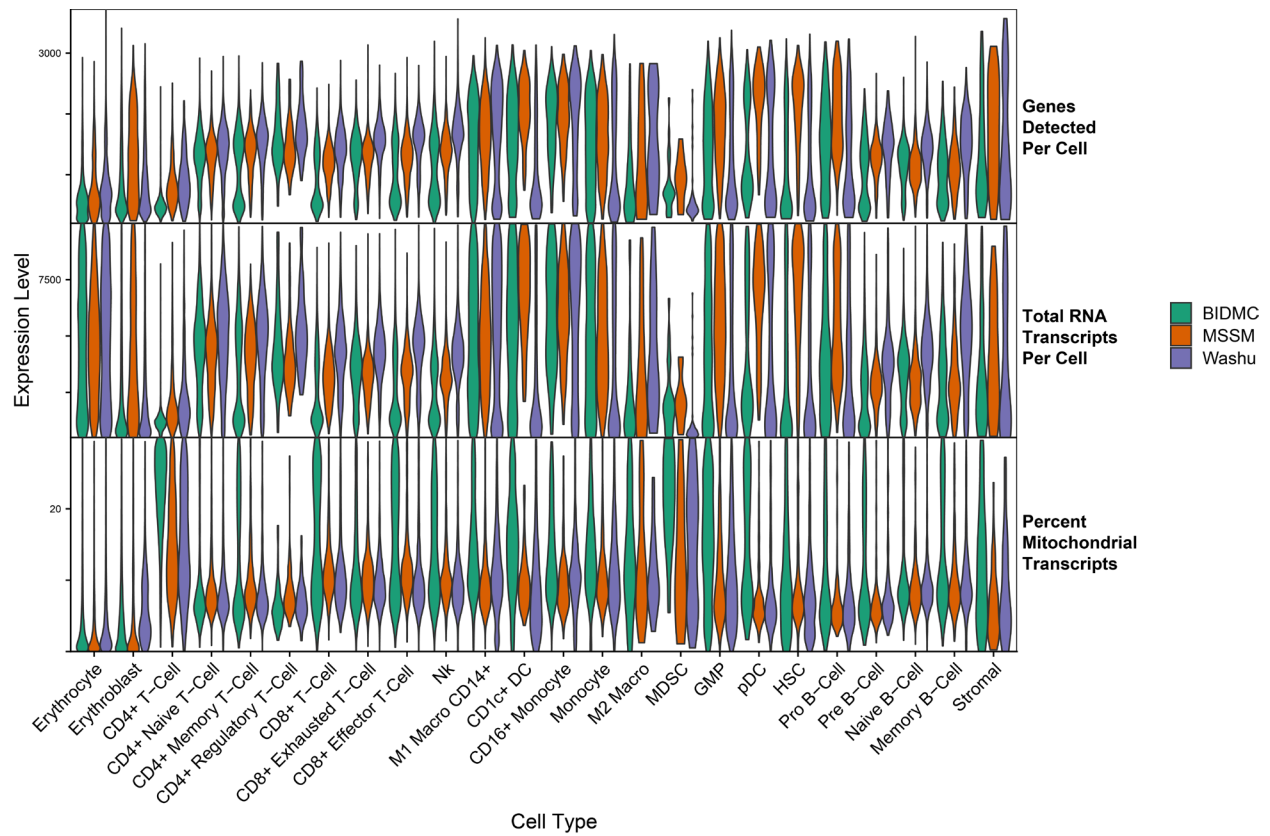

**Supplementary Figure 15: Overview of single cell data standard quality metrics for each Cell Type Split based on data generating center.** Violin plot displaying the quality control metrics for each cell type split by data generating centers (i.e., Washu, MSSM, BIDMC). Samples from BIDMC generally show a higher percentage of mitochondrial UMI, and a lower feature and UMI count relative to other centers. This would be consistent with lower viability, which may be due to the CITE-seq procedure performed at this center increasing processing time.

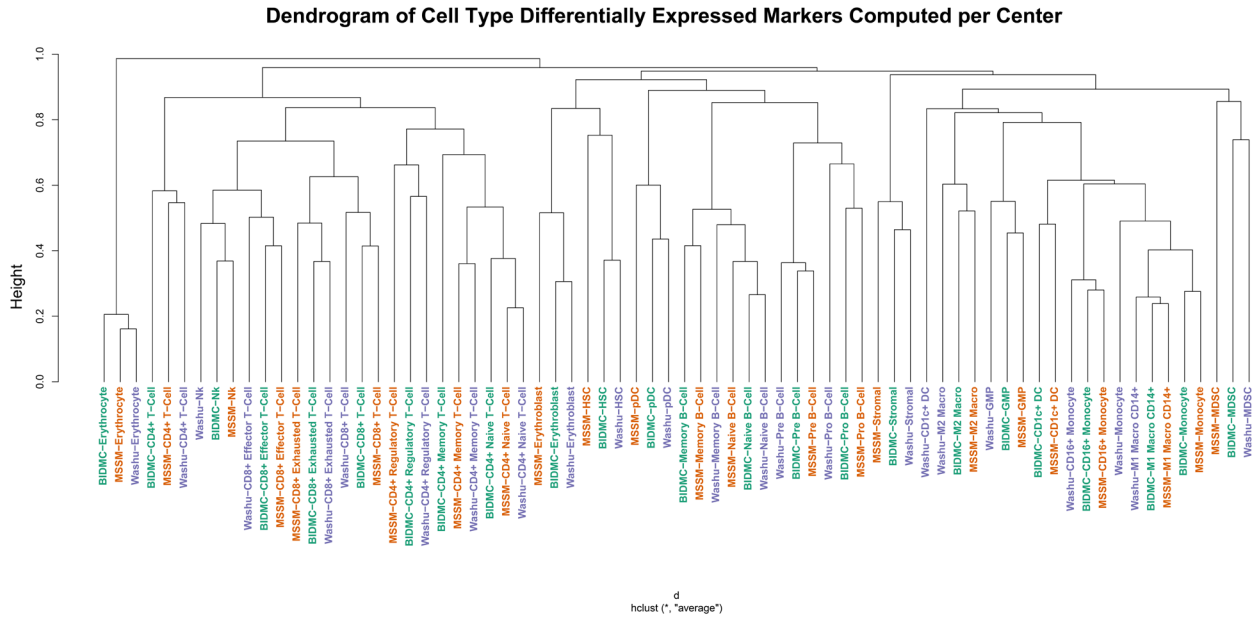

**Supplementary Figure 16: Assessing the similarity of the differentially expressed cell type markers across centers.** Dendrogram showing the distances between cell types from each center based on the differentially expressed genes for each cell type computed independently for each center. The differentially expressed genes were identified by comparing the target cell type with others based on log fold change >0.25 and Wilcoxon Rank Sum test P-value <0.01 as well as genes expressed in >25% of a given cell population.

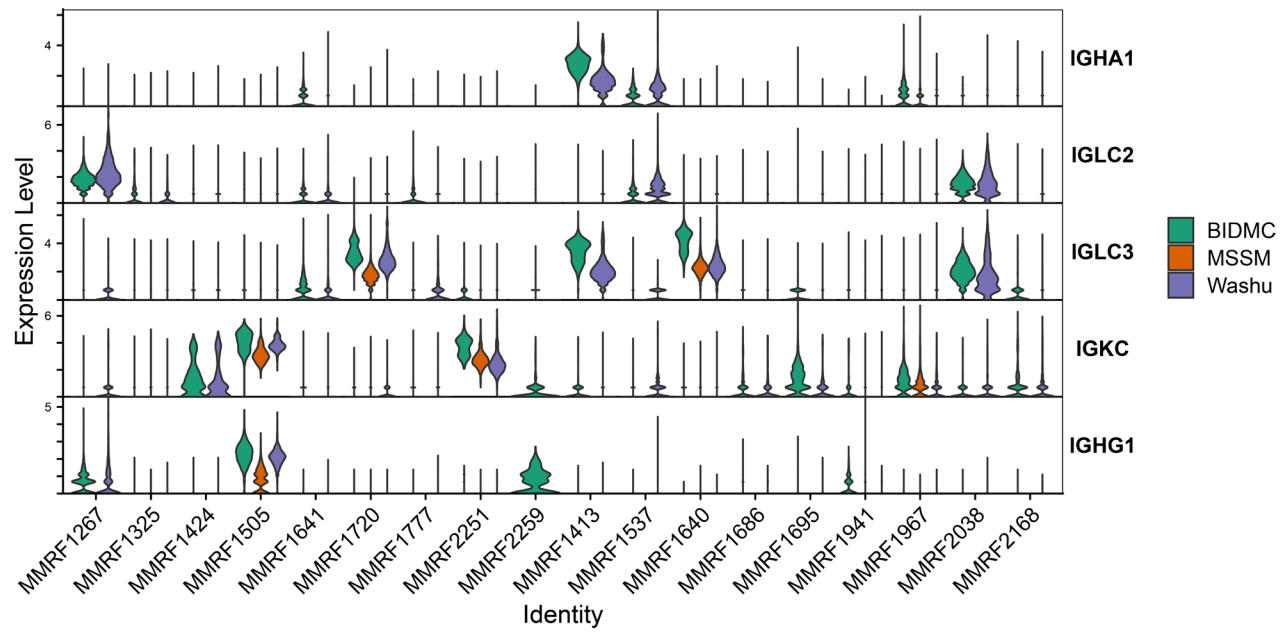

**Supplementary Figure 17: Contamination of Plasma Cell estimated based on Immunoglobulin Genes Across Patients.** Violin plots showing immunoglobulins gene expression in each sample separated based on the center. The presence of plasma cell contamination does not appear to be dependent on the processing center, but rather just the source of the sample.

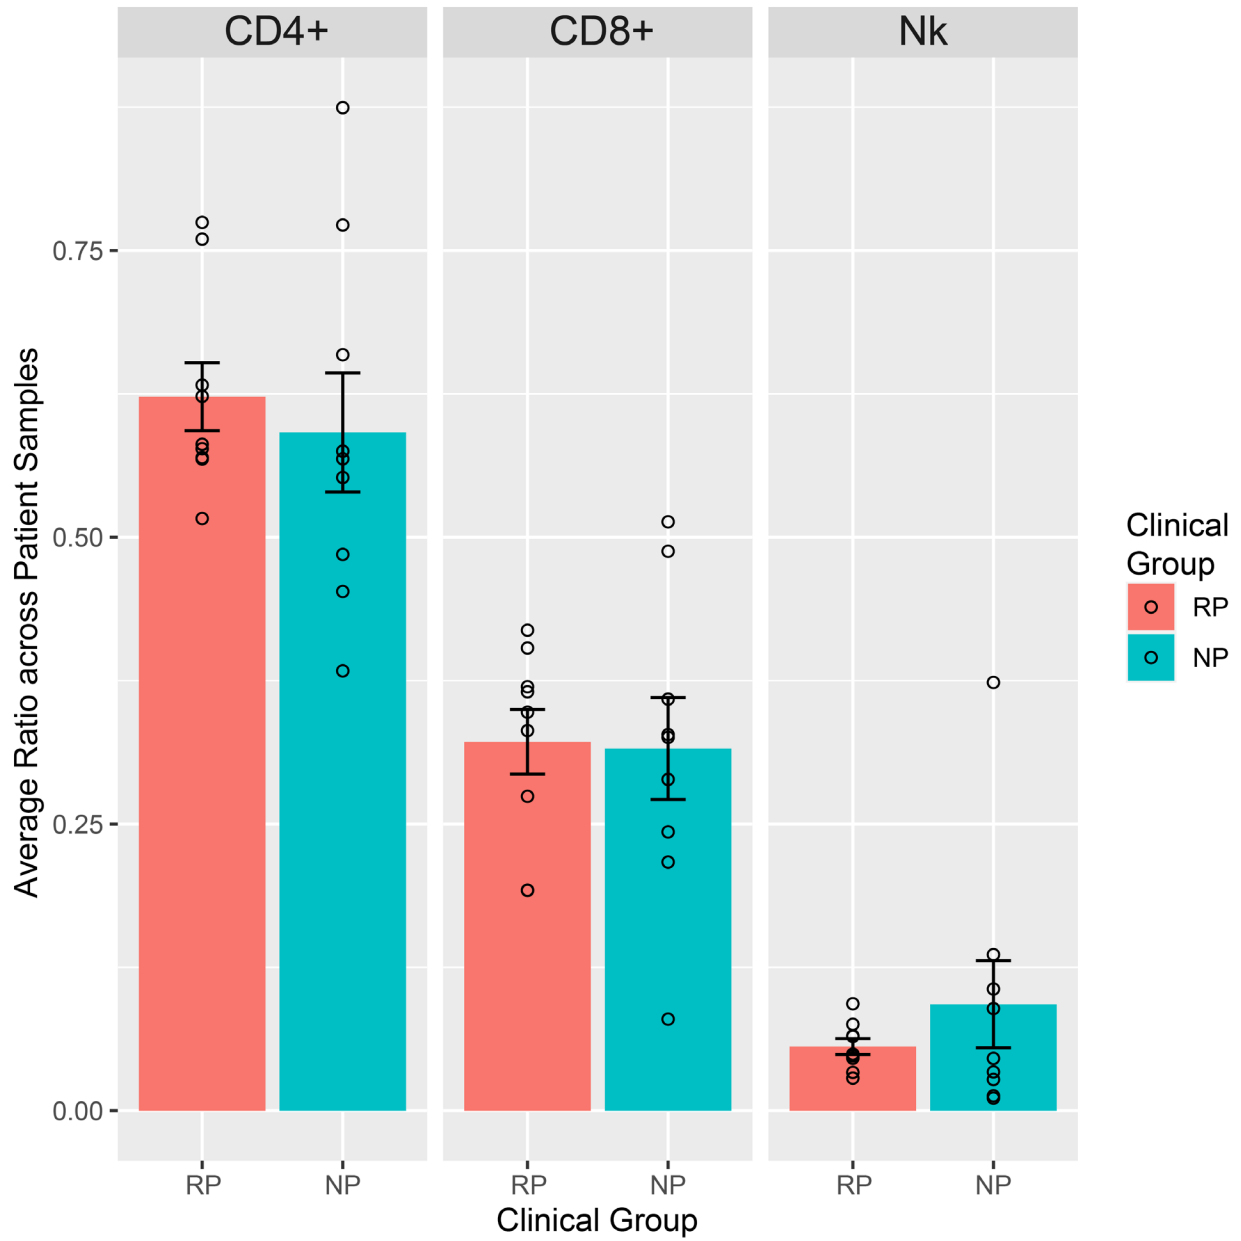

**Supplementary Figure 18: Comparative analysis of major T and NK subtypes between rapid- and non-progressive groups.** Comparative analysis of the CD4<sup>+</sup>, CD8<sup>+</sup>, and NK ratios across clinical groups. Each bar represents the mean ratio  $\pm$  standard error of the mean for a given cell type across samples in a clinical group. Dots represent individual patients. There are currently no significant differences in the CD4<sup>+</sup> T cells, CD8<sup>+</sup> T cells, and NK cells between clinical groups.

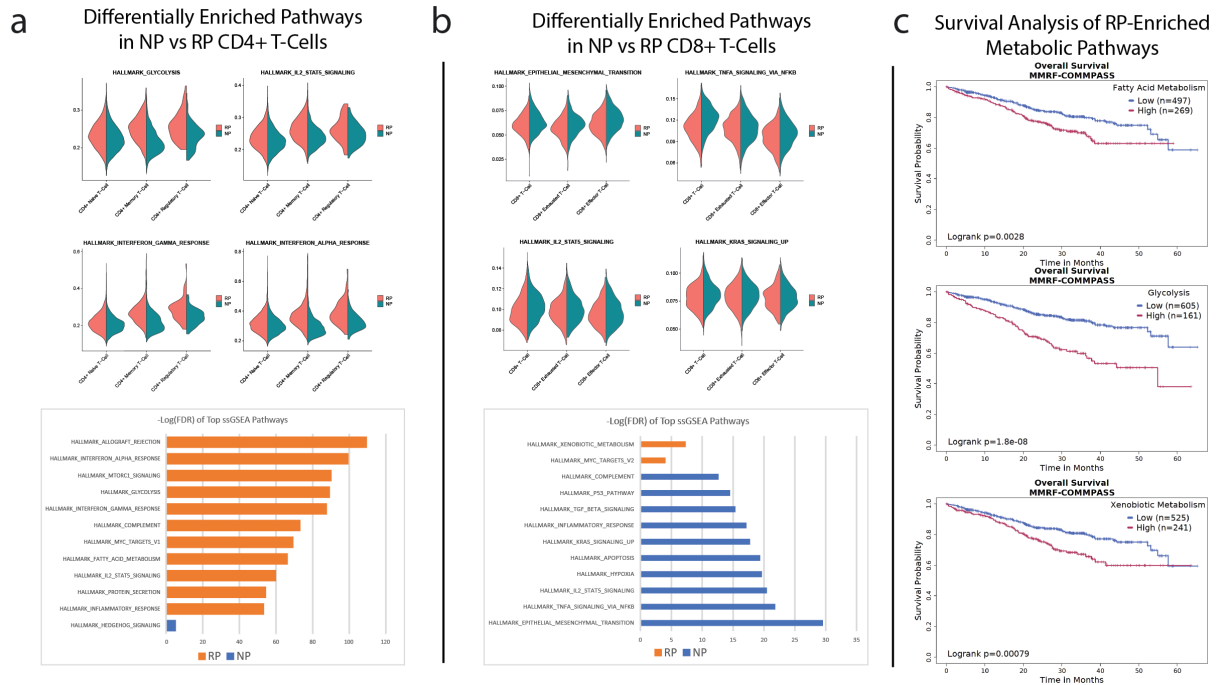

**Supplementary Figure 19: Differentially Expressed Pathways between clinical groups in the T-cell subset.**

**a:** Violin plots of top enriched pathways on the CD4<sup>+</sup> subset of T-cells. Red corresponds to RP samples, while blue corresponds to NP samples. A barchart displays the negative log of the adjusted P-value for enriched pathways (adjusted P-value < 0.05), with pathways enriched in RP in orange, and NP in blue. RP samples show enrichment of various interferon signaling pathways, and some metabolic pathways, such as Glycolysis and Fatty Acid Metabolism.

**b:** Violin plots of enriched GSEA pathways on the CD8<sup>+</sup> T-cell subsets. Red corresponds to RP samples, while blue corresponds to NP samples. A barchart displays the negative log of the adjusted P-value for subset of significantly enriched pathways (adjusted P-value < 0.05), with pathways enriched in RP in orange, and NP in blue. NP samples show enrichment of TNF signaling, while RP samples show enrichment of Xenobiotic Metabolism.

**c:** Survival analysis performed using Survival Genie platform against the MMRF CoMMpass dataset on the genes associated with the metabolic pathways enriched in RP samples. Enrichment of genes associated with Fatty Acid Metabolism, Glycolysis, and Xenobiotic Metabolism are all significantly associated with poorer survival (P = 0.0028, P = 1.8\*10<sup>-8</sup>, P = 0.00079).

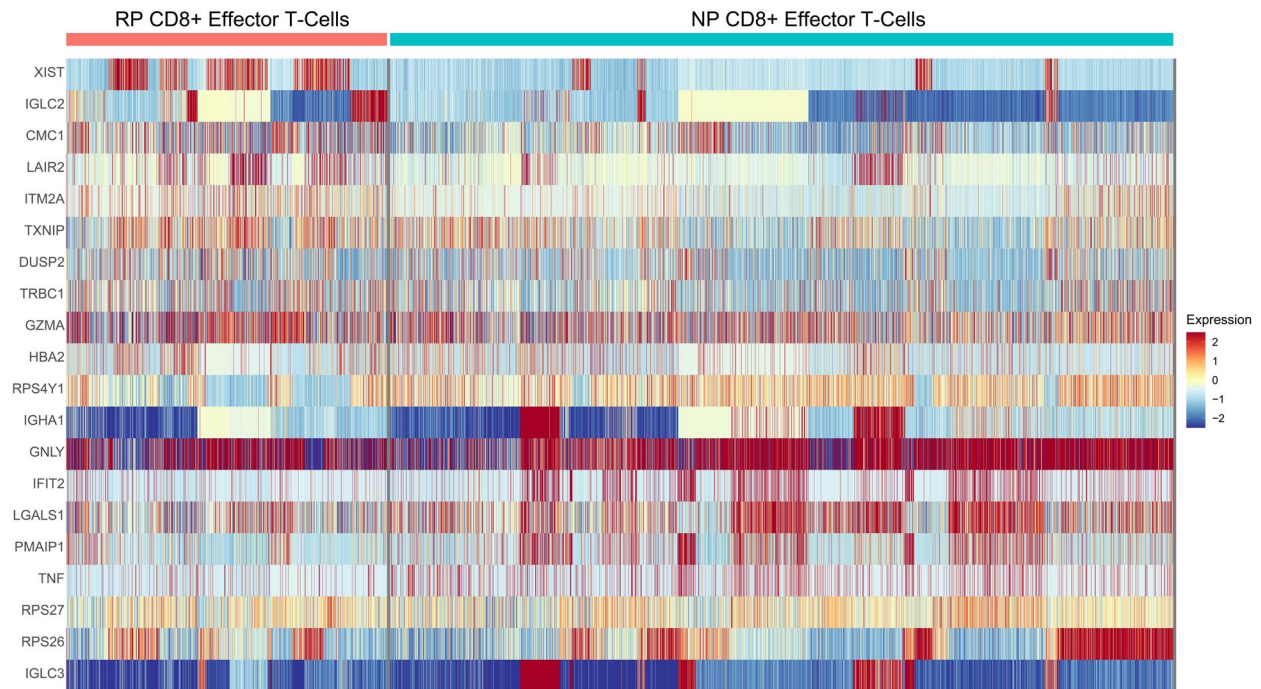

**Supplementary Figure 20: Differentially Expressed Genes between Clinical Groups in CD8+ Effector T-Cells.** A heatmap displaying the top differentially expressed genes between NP and RP groups within the CD8+ Effector T-Cell population. NP Effector cells show visibly more consistent expression of *TNF*, potentially indicating better cytokine and more typical effector function. Top markers show significant enrichment ( $P < 0.001$ ) of effector genes, such as *GZMB*, *GNLY*, and *TNF* genes in the NP population (Supplementary Table 2).



## Top Ligand-Receptor Interactions Received by CD8<sup>+</sup> Effector T-Cells by Information Score

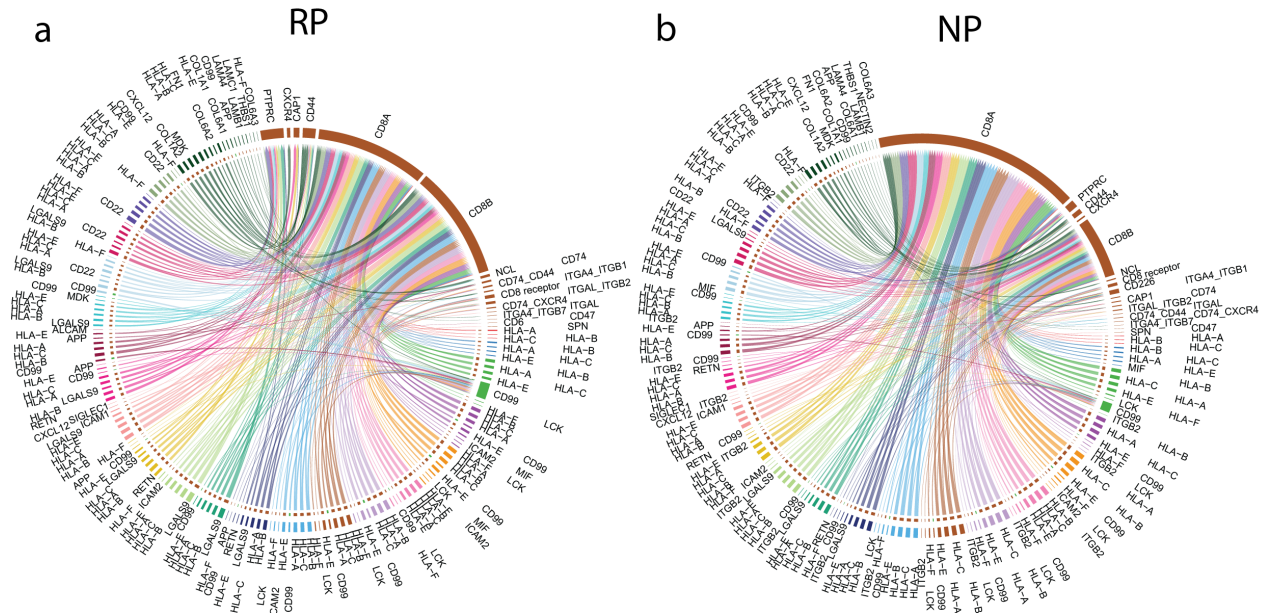

## Differentially Expressed Ligand-Receptor Interactions Received by CD8<sup>+</sup> Effector T-Cells

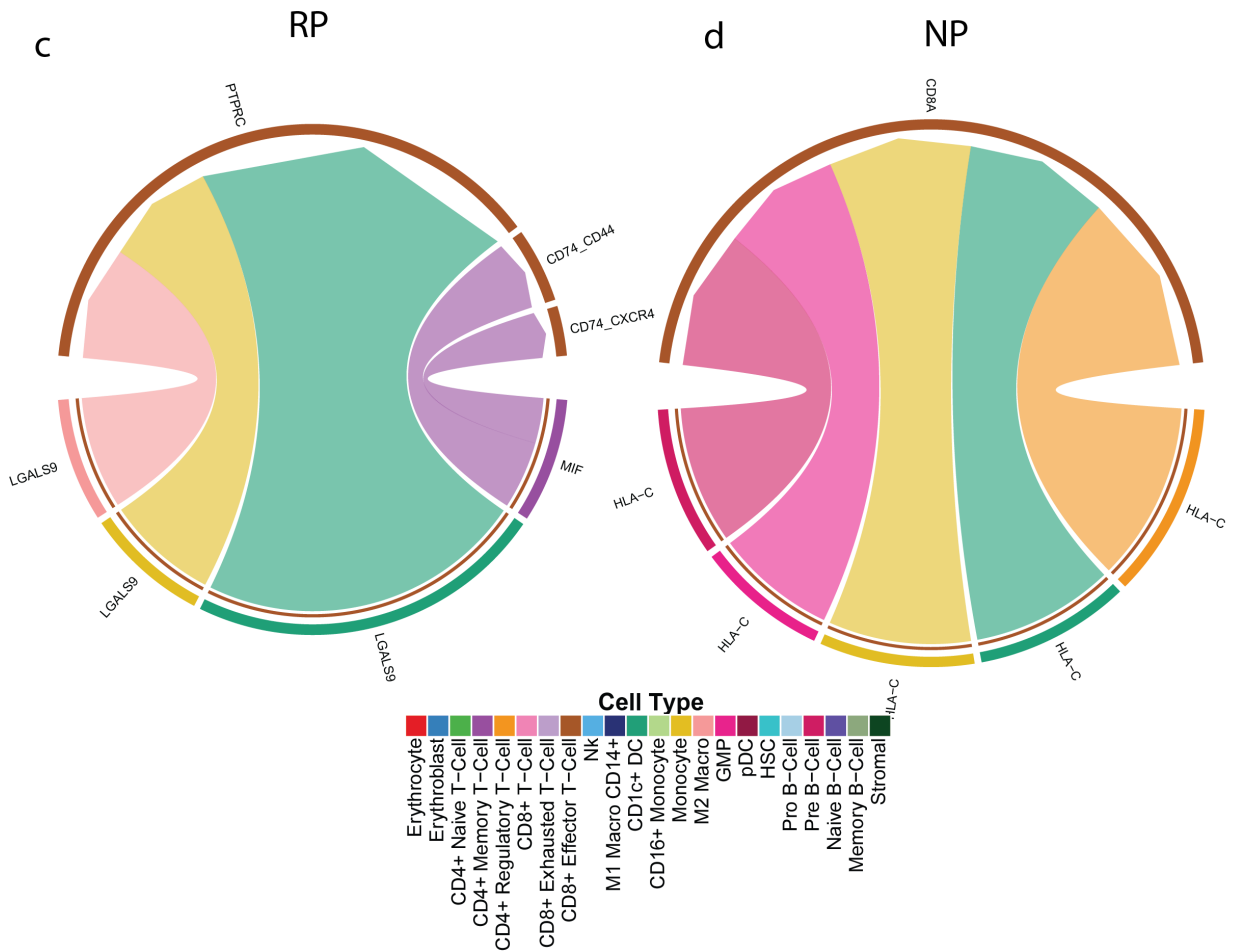

**Supplementary Figure 21: Ligand-Receptor Interactions Received by CD8+ Effector T-Cells in Rapid and Non-progressing Samples.** Circos plots comparing ligand-receptor interactions for CD8+ Effector T-Cells cells between the RP and NP population. The predominant signaling interaction appears to be from MHC-I – CD8 signaling. **a:** The top ligand-receptor interactions received by RP CD8+ Effector T-Cells, based on information flow. **b:** The top ligand-receptor interactions received by NP CD8+ Effector T-Cells, based on information flow. **c:** The differentially expressed ligand-receptor interactions received by RP CD8+ Effector T-cells. The only enriched signaling received by RP effector cells appears to be CD45-LGALS9 interactions. **d:** The differentially expressed ligand-receptor interactions received by NP CD8+ Effector T-cells cells. MHC-I – CD8 interactions are enriched in NP effector cells from multiple sender cell populations.

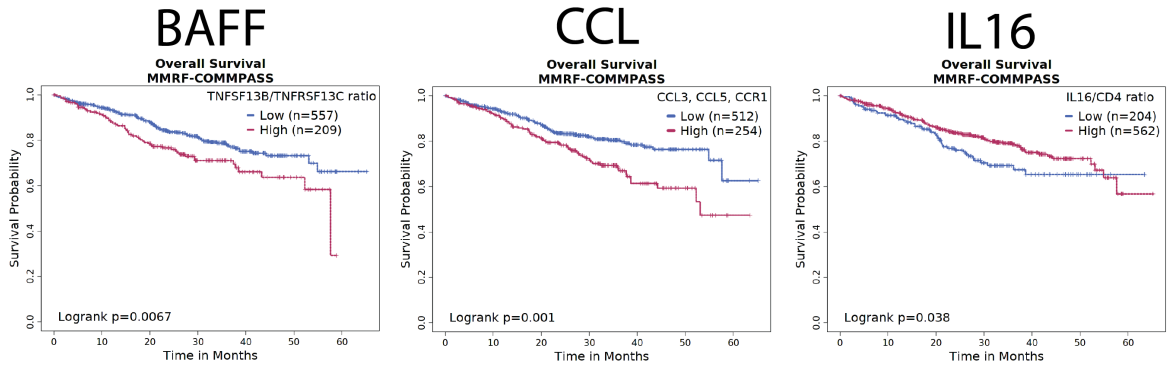

**Supplementary Figure 22: Survival Analysis of Select Ligands and Receptors Identified cellular communication analysis.** Survival analysis of BAFF, IL16, and CCL signaling in the MMRF CoMMpass dataset provided using the Survival Genie platform. The overexpression of BAFF ligand *TNFSF13B* relative to the typical B-Cell receptor, *TNFRSF13C*, is associated with poorer outcomes ( $P = 0.0067$ ). General enrichment of ligands and receptors in CCL signaling (*CCL3*, *CCL5*, *CCR1*) is associated with poorer survival ( $P = 0.01$ ). Overexpression of IL16 relative to CD4 within the Myeloma cell compartment is associated with better survival ( $P = 0.038$ ).

| <i>Patient</i>  | <i>Clinical Group</i> | <i>Age (At Diagnosis)</i> | <i>Gender</i> | <i>Race</i> | <i>ISS</i> | <i>BIDMC</i> | <i>MSSM</i> | <i>WashU</i> | <i>IMWG Risk Class</i> | <i>ECOG Assessment</i> | <i>Gene Fusions</i>                                                                            |
|-----------------|-----------------------|---------------------------|---------------|-------------|------------|--------------|-------------|--------------|------------------------|------------------------|------------------------------------------------------------------------------------------------|
| <i>MMRF1267</i> | RP                    | 39                        | Male          | White       | 2          | Y            |             | Y            | 2                      | 1                      | Not Available                                                                                  |
| <i>MMRF1325</i> | RP                    | 58                        | Female        | Other       | 3          | Y            | Y           | Y            | 1                      | 1                      | MALAT1-IGL@-ext, B2M--IGL@-ext, FOSB--KLF2, FOSB--UBC, TSMC3-AS1--AC023034.1                   |
| <i>MMRF1424</i> | RP                    | 40                        | Female        | White       | 3          | Y            |             | Y            | 2                      | 1                      | ERLEC1--ACYP2, PRKCB--SCNN1B, AC109349.1--LINC02472, RHOXF1-AS1--NKAPP1, IGH-@-ext--AC244205.1 |
| <i>MMRF1505</i> | RP                    | 62                        | Male          | White       | 3          | Y            | Y           | Y            | 2                      | 1                      | Not Available                                                                                  |
| <i>MMRF1641</i> | RP                    | 70                        | Male          | White       | 3          | Y            |             | Y            | 2                      | 3                      | IGH@-ext--AC245060.7, IGH@--AC245060.7, RYR1--SOHLH2, AC068413.1--CCDC26, PPP3CA--LINC01524    |
| <i>MMRF1720</i> | RP                    | 83                        | Male          | White       | 3          | Y            | Y           | Y            | 1                      | 2                      | MTND2P28--IGL@-ext, AL162253.2--PLGRKT, AC005394.1--AC005381.1, AC093639.2--AC020584.1,        |

|                 |    |    |        |       |   |   |   |   |               |               |                                                                                                                                                       |
|-----------------|----|----|--------|-------|---|---|---|---|---------------|---------------|-------------------------------------------------------------------------------------------------------------------------------------------------------|
| <i>MMRF1777</i> | RP | 67 | Female | White | 1 | Y |   | Y | 0             | 2             | IGL@-ext--<br>PFKL<br>IGH@-ext--<br>TXNDC5,<br>MTND2P28--<br>IGL@-ext,<br>AL138963.4--<br>IGL@-ext,<br>C12orf73--<br>IGL@-ext,<br>IGH@-ext--<br>SPON2 |
| <i>MMRF2251</i> | RP | 47 | Female | White | 3 | Y |   | Y | 2             | 1             | MRPS16--<br>CFAP70,<br>ATP11C--MCF2                                                                                                                   |
| <i>MMRF2259</i> | RP | 50 | Female | Black | 3 | Y |   |   | Not Available | 1             | Not Available                                                                                                                                         |
| <i>MMRF1413</i> | NP | 71 | Male   | White | 3 | Y |   | Y | 1             | 1             | IGH@--<br>EEF1A1,<br>CREB3L2--<br>DGKI,<br>AC009570.2--<br>IGL@-ext,<br>B2M--KLF2,<br>STK25--IGH@-<br>ext                                             |
| <i>MMRF1537</i> | NP | 62 | Male   | White | 3 | Y |   | Y | 1             | 1             | JCHAIN--<br>IGH@-ext,<br>IGL@-ext--<br>PRAMENP,<br>PLCXD1--<br>IGH@-ext,<br>IGL@-ext--<br>DGKG                                                        |
| <i>MMRF1640</i> | NP | 71 | Male   | White | 3 | Y | Y | Y | 1             | 1             | OAZ1--KLF2,<br>ZFP36--KLF2                                                                                                                            |
| <i>MMRF1686</i> | NP | 38 | Female | White | 1 | Y |   | Y | 0             | 1             | CD40--IGL@                                                                                                                                            |
| <i>MMRF1695</i> | NP | 61 | Male   | White | 3 | Y |   | Y | 1             | Not Available | IGH@-ext--<br>EEF1A1P5,<br>IGH@-ext--<br>TXNDC5,                                                                                                      |

|                 |    |    |        |       |   |   |   |   |               |   |                                                                                                                                                              |
|-----------------|----|----|--------|-------|---|---|---|---|---------------|---|--------------------------------------------------------------------------------------------------------------------------------------------------------------|
| <i>MMRF1941</i> | NP | 59 | Male   | White | 2 | Y | Y | Y | Not Available | 0 | IGH@-ext--AC244205.1, FOSB--KLF2, IGL-@-ext--PRAMENP, IGH@-ext--NSD2, FOSB--KLF2, AC087280.2--DCHS1, AL391840.3--SH3BGRL2, GPIHBP1--IGL@-ext                 |
| <i>MMRF1967</i> | NP | 74 | Male   | White | 2 | Y | Y | Y | 0             | 0 | PAX5--IGH@-ext, DDX42--TANC2, AC106741.1--AC106729.1, AL391840.3--SH3BGRL2, NFKB2--TRIM8, AC093639.2--AC020584.1, C12orf73--IGL@-ext, FOSB--KLF2, OAZ1--KLF2 |
| <i>MMRF2038</i> | NP | 37 | Female | White | 3 | Y |   | Y | 1             | 3 | AC244205.1--IGH@-ext, IGL-@-ext--PRAMENP, SNX22--IGH@-ext, FOS--IGH@-ext, IGH@--SIK1                                                                         |
| <i>MMRF2168</i> | NP | 50 | Male   | Black | 1 | Y |   | Y | 0             | 0 |                                                                                                                                                              |

Supplementary Table 1: Demographic, clinical, and genetic information about the 18 patients included in the study, along with information about sample processing centers.

| GENE     | P_VAL     | AVG_LOG2FC | PCT.1 | PCT.2 | P_VAL_ADJ | CLUSTER | GENE     |
|----------|-----------|------------|-------|-------|-----------|---------|----------|
| XIST     | 4.73E-191 | 0.957753   | 0.41  | 0.052 | 8.39E-187 | RP      | XIST     |
| IGLC2    | 9.51E-64  | 0.43629    | 0.245 | 0.063 | 1.69E-59  | RP      | IGLC2    |
| CMC1     | 4.81E-38  | 0.479971   | 0.448 | 0.261 | 8.54E-34  | RP      | CMC1     |
| LAIR2    | 1.10E-35  | 0.271827   | 0.208 | 0.076 | 1.95E-31  | RP      | LAIR2    |
| ITM2A    | 2.75E-30  | 0.260403   | 0.325 | 0.172 | 4.88E-26  | RP      | ITM2A    |
| TXNIP    | 7.37E-14  | 0.293082   | 0.953 | 0.957 | 1.31E-09  | RP      | TXNIP    |
| DUSP2    | 8.95E-14  | 0.225641   | 0.493 | 0.376 | 1.59E-09  | RP      | DUSP2    |
| GZMK     | 1.15E-08  | 0.20959    | 0.227 | 0.155 | 0.000204  | RP      | GZMK     |
| TRBC1    | 1.55E-06  | 0.241907   | 0.445 | 0.387 | 0.027435  | RP      | TRBC1    |
| GZMA     | 1.11E-05  | 0.209655   | 0.76  | 0.759 | 0.196886  | RP      | GZMA     |
| HBA2     | 0.001141  | 0.383479   | 0.244 | 0.199 | 1         | RP      | HBA2     |
| RPS4Y1   | 3.17E-116 | 0.758573   | 0.688 | 0.303 | 5.63E-112 | NP      | RPS4Y1   |
| IGHA1    | 2.23E-33  | 0.925809   | 0.226 | 0.077 | 3.95E-29  | NP      | IGHA1    |
| GNLY     | 4.77E-32  | 0.553786   | 0.784 | 0.655 | 8.47E-28  | NP      | GNLY     |
| DDX3Y    | 5.08E-32  | 0.286273   | 0.368 | 0.182 | 9.01E-28  | NP      | DDX3Y    |
| IFIT2    | 2.45E-29  | 0.855113   | 0.233 | 0.095 | 4.35E-25  | NP      | IFIT2    |
| LGALS1   | 2.99E-29  | 0.519459   | 0.566 | 0.414 | 5.30E-25  | NP      | LGALS1   |
| PMAIP1   | 2.64E-23  | 0.66558    | 0.356 | 0.228 | 4.69E-19  | NP      | PMAIP1   |
| CD8A     | 6.27E-23  | 0.31959    | 0.524 | 0.365 | 1.11E-18  | NP      | CD8A     |
| RPS27A   | 4.07E-20  | 0.252505   | 1     | 0.998 | 7.22E-16  | NP      | RPS27A   |
| RPL26    | 3.55E-19  | 0.26874    | 0.996 | 0.991 | 6.30E-15  | NP      | RPL26    |
| RPL39    | 5.09E-19  | 0.27942    | 0.999 | 0.996 | 9.03E-15  | NP      | RPL39    |
| TNF      | 7.57E-18  | 0.355121   | 0.202 | 0.098 | 1.34E-13  | NP      | TNF      |
| RPLP1    | 2.00E-16  | 0.243544   | 1     | 0.998 | 3.55E-12  | NP      | RPLP1    |
| RPL34    | 4.12E-16  | 0.248138   | 1     | 0.997 | 7.31E-12  | NP      | RPL34    |
| RPS27    | 4.15E-16  | 0.331514   | 1     | 0.998 | 7.36E-12  | NP      | RPS27    |
| NFKBIA   | 1.23E-15  | 0.275355   | 0.747 | 0.666 | 2.18E-11  | NP      | NFKBIA   |
| RPS15A   | 1.62E-15  | 0.22181    | 0.999 | 0.996 | 2.87E-11  | NP      | RPS15A   |
| RPL23A   | 5.28E-15  | 0.244312   | 0.998 | 0.995 | 9.37E-11  | NP      | RPL23A   |
| RPL14    | 9.05E-15  | 0.208288   | 0.997 | 0.993 | 1.61E-10  | NP      | RPL14    |
| RPS14    | 9.28E-15  | 0.209837   | 1     | 0.998 | 1.65E-10  | NP      | RPS14    |
| RPS12    | 1.05E-14  | 0.217714   | 0.998 | 0.996 | 1.86E-10  | NP      | RPS12    |
| ITGB1    | 1.25E-14  | 0.237638   | 0.598 | 0.483 | 2.22E-10  | NP      | ITGB1    |
| RPL37A   | 2.13E-14  | 0.26619    | 0.997 | 0.992 | 3.78E-10  | NP      | RPL37A   |
| CD52     | 2.99E-14  | 0.309449   | 0.848 | 0.788 | 5.30E-10  | NP      | CD52     |
| PPP1R15A | 5.78E-14  | 0.26897    | 0.544 | 0.428 | 1.03E-09  | NP      | PPP1R15A |
| RPS3     | 6.88E-14  | 0.202415   | 1     | 0.996 | 1.22E-09  | NP      | RPS3     |
| JUND     | 8.25E-14  | 0.231484   | 0.934 | 0.923 | 1.46E-09  | NP      | JUND     |
| RPL41    | 2.40E-13  | 0.224582   | 1     | 0.998 | 4.25E-09  | NP      | RPL41    |
| ANXA1    | 2.93E-13  | 0.264589   | 0.753 | 0.66  | 5.20E-09  | NP      | ANXA1    |
| CRIP1    | 4.53E-13  | 0.259311   | 0.409 | 0.308 | 8.03E-09  | NP      | CRIP1    |
| TNFAIP3  | 5.29E-13  | 0.308608   | 0.437 | 0.337 | 9.39E-09  | NP      | TNFAIP3  |

|                |          |          |       |       |          |    |         |
|----------------|----------|----------|-------|-------|----------|----|---------|
| <b>S100A10</b> | 5.65E-13 | 0.26638  | 0.738 | 0.661 | 1.00E-08 | NP | S100A10 |
| <b>RPL21</b>   | 8.24E-13 | 0.224668 | 0.998 | 0.995 | 1.46E-08 | NP | RPL21   |
| <b>RPS21</b>   | 1.13E-12 | 0.207394 | 0.988 | 0.973 | 2.01E-08 | NP | RPS21   |
| <b>FGFBP2</b>  | 2.02E-12 | 0.265006 | 0.638 | 0.539 | 3.59E-08 | NP | FGFBP2  |
| <b>RPS18</b>   | 2.76E-12 | 0.202983 | 0.999 | 0.996 | 4.89E-08 | NP | RPS18   |
| <b>CYTOR</b>   | 9.74E-12 | 0.223619 | 0.391 | 0.292 | 1.73E-07 | NP | CYTOR   |
| <b>S100A4</b>  | 2.13E-11 | 0.241591 | 0.887 | 0.849 | 3.78E-07 | NP | S100A4  |
| <b>RPL37</b>   | 2.89E-11 | 0.228638 | 0.998 | 0.995 | 5.13E-07 | NP | RPL37   |
| <b>FOS</b>     | 1.10E-10 | 0.309332 | 0.615 | 0.529 | 1.95E-06 | NP | FOS     |
| <b>RPS26</b>   | 1.53E-10 | 0.541942 | 0.85  | 0.809 | 2.71E-06 | NP | RPS26   |
| <b>TRBC2</b>   | 1.72E-10 | 0.22511  | 0.64  | 0.57  | 3.05E-06 | NP | TRBC2   |
| <b>GZMB</b>    | 2.01E-10 | 0.221009 | 0.593 | 0.501 | 3.57E-06 | NP | GZMB    |
| <b>KLF6</b>    | 2.94E-10 | 0.265233 | 0.871 | 0.842 | 5.22E-06 | NP | KLF6    |
| <b>RPS28</b>   | 3.04E-10 | 0.201065 | 0.998 | 0.991 | 5.39E-06 | NP | RPS28   |
| <b>RPS29</b>   | 2.96E-08 | 0.215475 | 0.992 | 0.984 | 0.000525 | NP | RPS29   |
| <b>IGLC3</b>   | 4.79E-07 | 1.406228 | 0.222 | 0.175 | 0.008495 | NP | IGLC3   |
| <b>DUSP1</b>   | 8.37E-07 | 0.207332 | 0.653 | 0.582 | 0.014847 | NP | DUSP1   |

**Supplementary Table 2: Top Differentially Expressed Genes Between Rapid and Non-Progressors in the CD8+ Effector T-cell Population.**



| REAGENT or RESOURCE                                 | SOURCE               | IDENTIFIER |
|-----------------------------------------------------|----------------------|------------|
| Antibodies                                          |                      |            |
| TotalSeq™-B 0005 anti-human CD80                    | Biolegend totalseq B | 305241     |
| TotalSeq™-B 0006 anti-human CD86                    | Biolegend totalseq B | 305445     |
| TotalSeq™-B 0007 anti-human CD274 (B7-H1,PD-L1)     | Biolegend totalseq B | 329749     |
| TotalSeq™-B 0034 anti-human CD3                     | Biolegend totalseq B | 300477     |
| TotalSeq™-B 0050 anti-human CD19                    | Biolegend totalseq B | 302263     |
| TotalSeq™-B 0063 anti-human CD45RA                  | Biolegend totalseq B | 304161     |
| TotalSeq™-B 0072 anti-human CD4                     | Biolegend totalseq B | 300565     |
| TotalSeq™-B 0080 anti-human CD8a                    | Biolegend totalseq B | 301069     |
| TotalSeq™-B 0081 anti-human CD14                    | Biolegend totalseq B | 301857     |
| TotalSeq™-B 0083 anti-human CD16                    | Biolegend totalseq B | 302063     |
| TotalSeq™-B 0084 anti-human CD56 (NCAM)             | Biolegend totalseq B | 392423     |
| Recombinant                                         |                      |            |
| TotalSeq™-B 0085 anti-human CD25                    | Biolegend totalseq B | 302647     |
| TotalSeq™-B 0087 anti-human CD45RO                  | Biolegend totalseq B | 304257     |
| TotalSeq™-B 0088 anti-human CD279 (PD-1)            | Biolegend totalseq B | 329961     |
| TotalSeq™-B 0089 anti-human TIGIT (VSTM3)           | Biolegend totalseq B | 372727     |
| TotalSeq™-B 0100 anti-human CD20                    | Biolegend totalseq B | 302361     |
| TotalSeq™-B 0101 anti-human CD335 (NKp46)           | Biolegend totalseq B | 331939     |
| TotalSeq™-B 0146 anti-human CD69                    | Biolegend totalseq B | 310949     |
| TotalSeq™-B 0147 anti-human CD62L                   | Biolegend totalseq B | 304849     |
| TotalSeq™-B 0148 anti-human CD197 (CCR7)            | Biolegend totalseq B | 353249     |
| TotalSeq™-B 0154 anti-human CD27                    | Biolegend totalseq B | 302851     |
| TotalSeq™-B 0159 anti-human HLA-DR                  | Biolegend totalseq B | 307661     |
| TotalSeq™-B 0161 anti-human CD11b                   | Biolegend totalseq B | 301357     |
| TotalSeq™-B 0171 anti-human/mouse/rat CD278 (ICOS)  | Biolegend totalseq B | 313551     |
| TotalSeq™-B 0355 anti-human CD137 (4-1BB)           | Biolegend totalseq B | 309837     |
| TotalSeq™-B 0386 anti-human CD28                    | Biolegend totalseq B | 302961     |
| TotalSeq™-B 0390 anti-human CD127 (IL-7R $\alpha$ ) | Biolegend totalseq B | 351354     |
| TotalSeq™-B 0391 anti-human CD45                    | Biolegend totalseq B | 304066     |
| TotalSeq™-B 0392 anti-human CD15 (SSEA-1)           | Biolegend totalseq B | 323051     |

**Supplementary Table 3: List of TotalSeq antibodies used to capture surface marker expression with CITE-seq assay.**



| Major Class | B-Cell           |                     |                  |                  | Progenitor/Other       |            |         |
|-------------|------------------|---------------------|------------------|------------------|------------------------|------------|---------|
| Cell Type   | Pro B-Cell       | Pre B-Cell          | Naïve B-Cell     | Memory B-Cell    | pDC                    | HSC        | Stromal |
| Citations   | Lee et al., 2021 | Lee et al., 2021    | Lee et al., 2021 | Lee et al., 2021 | van Galen et al., 2019 |            |         |
| Markers     | RAG1             | CD79A/B             | CD79A/B          | CD79A/B          | GZMB                   | CD34       | CXCL12  |
|             | RAG2             | MS4A1 LOW           | MS4A1            | MS4A1            | JCHAIN                 | No CD14    | APOE    |
|             | IgLL1            | IgLL1 - LOW         |                  | IGHM             | CLEC10A                | No CD3D/E  |         |
|             | DNTT             | Light Chain present |                  | CD27             | IRF8                   | No CD79A/B |         |
|             | VPREB1           |                     |                  | VCAM1            |                        | No IgLL1   |         |
|             |                  |                     |                  |                  |                        | No DNTT    |         |
|             |                  |                     |                  |                  |                        | No HBA/B/D |         |
|             |                  |                     |                  |                  |                        | MKI67      |         |
|             |                  |                     |                  |                  |                        | TOP2A      |         |
|             |                  |                     |                  |                  | CENPF/B                |            |         |

**Supplementary Table 4: Table of various cell type markers used to annotate different cell type.**
